# Supplementary material for: Computational elucidation of the reaction mechanism for synthesis of pyrrolidinedione derivatives via Nef-type rearrangement – cyclization reaction
Source: Royal Society of Chemistry journal article supplement (doi:10.1039/c7ra11908a), 2018-01-01
Supplement: c7ra11908a1.pdf [file c7ra11908a1.pdf]

## Electronic supplementary information

### Computational Elucidation of the Reaction Mechanism for Synthesis of Pyrrolidinedione Derivatives via Nef-type Rearrangement – Cyclization Reaction

Eleonora D. Ilieva, Galina P. Petrova, Rositca D. Nikolova, and Georgi N. Vayssilov\*

\* Faculty of Chemistry and Pharmacy, Sofia University, 1, James Bourchier Blvd, 1164  
Sofia, Bulgaria, E-mail: gnv@chem.uni-sofia.bg

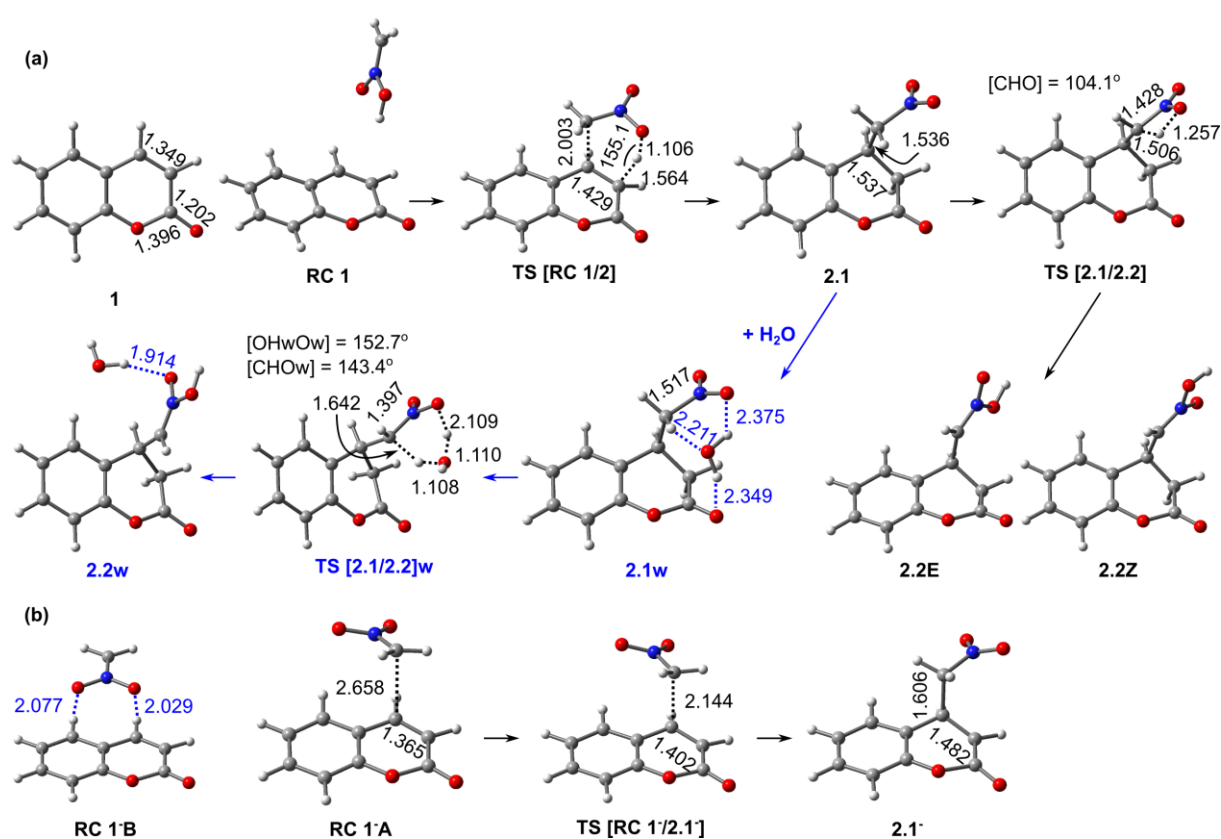

**Figure S1.** Structures of reaction complexes, transition states and intermediates for Michael addition of nitromethane,  $\text{CH}_3\text{NO}_2$  (a), and deprotonated nitromethane,  $\text{CH}_2\text{NO}_2^-$  (b), to coumarin **1** (only  $\sigma$ -skeleton is shown; interatomic distances in Å, angles in degrees).

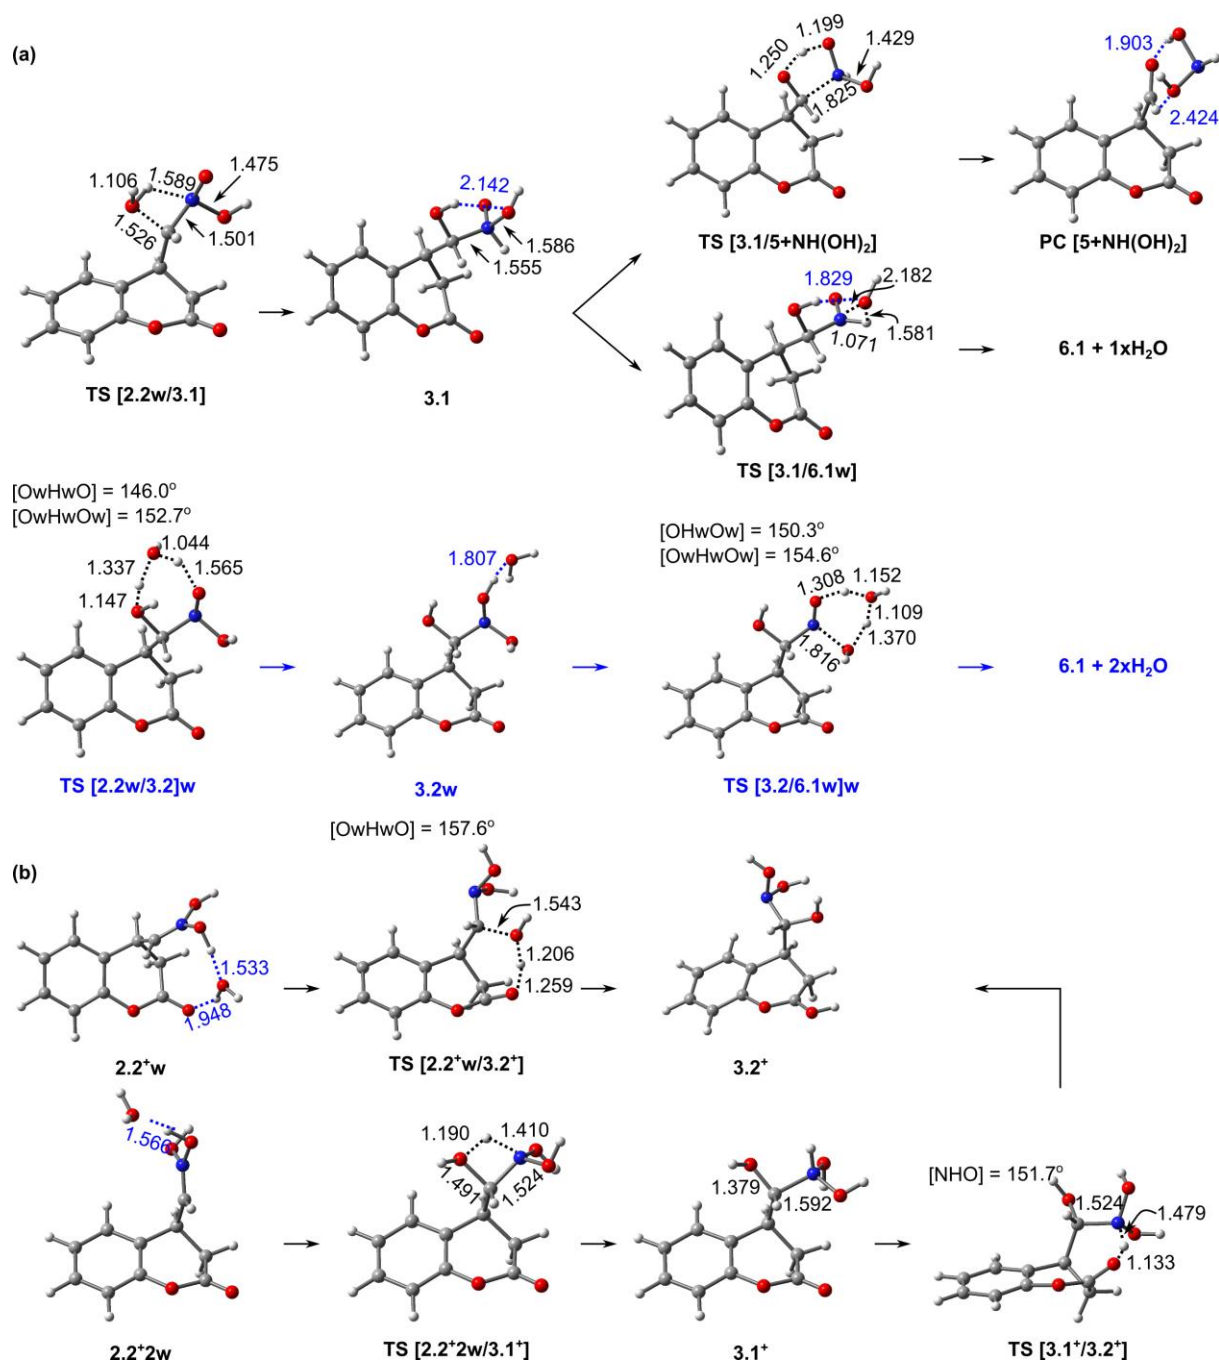

**Figure S2.** Structures of reaction complexes, transition states and intermediates for O-atom migration assisted by a water molecule (a) and assisted by a water molecule in acidic solution (b). (only  $\sigma$ -skeleton is shown; interatomic distances in Å, angles in degrees).

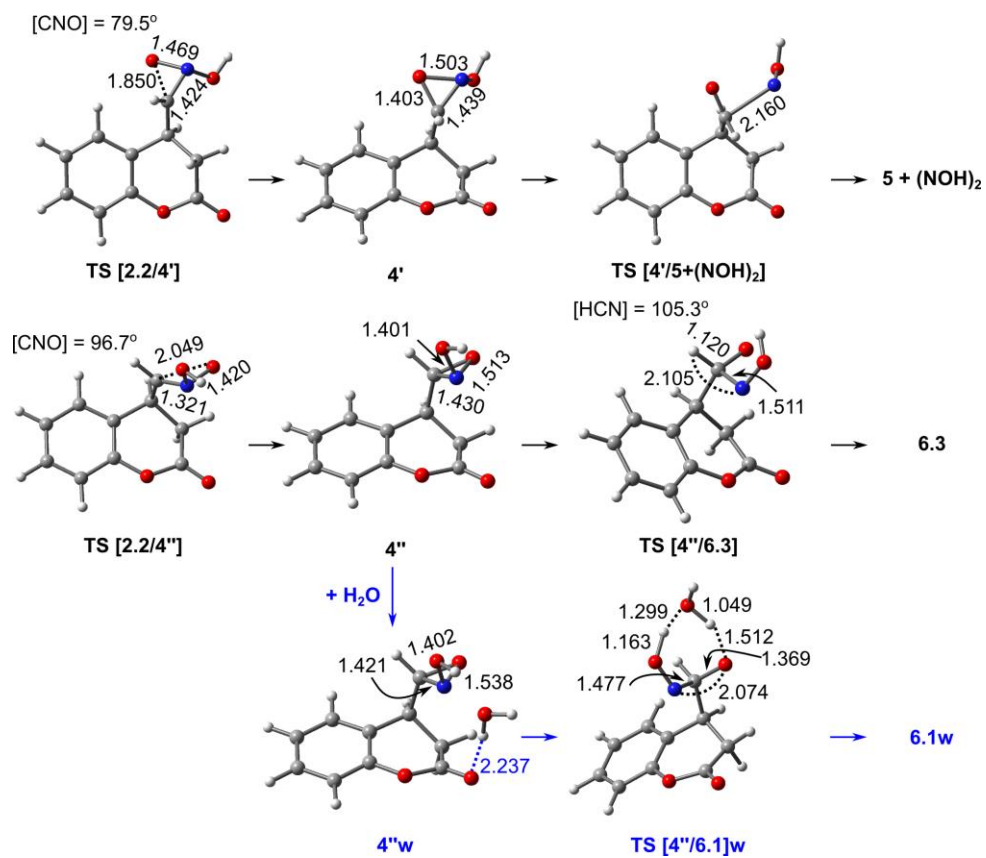

**Figure S3.** Structures of reaction complexes, transition states and intermediates for O-atom migration via formation of a three-membered oxaziridine cycle. (only  $\sigma$ -skeleton is shown; interatomic distances in Å, angles in degrees).

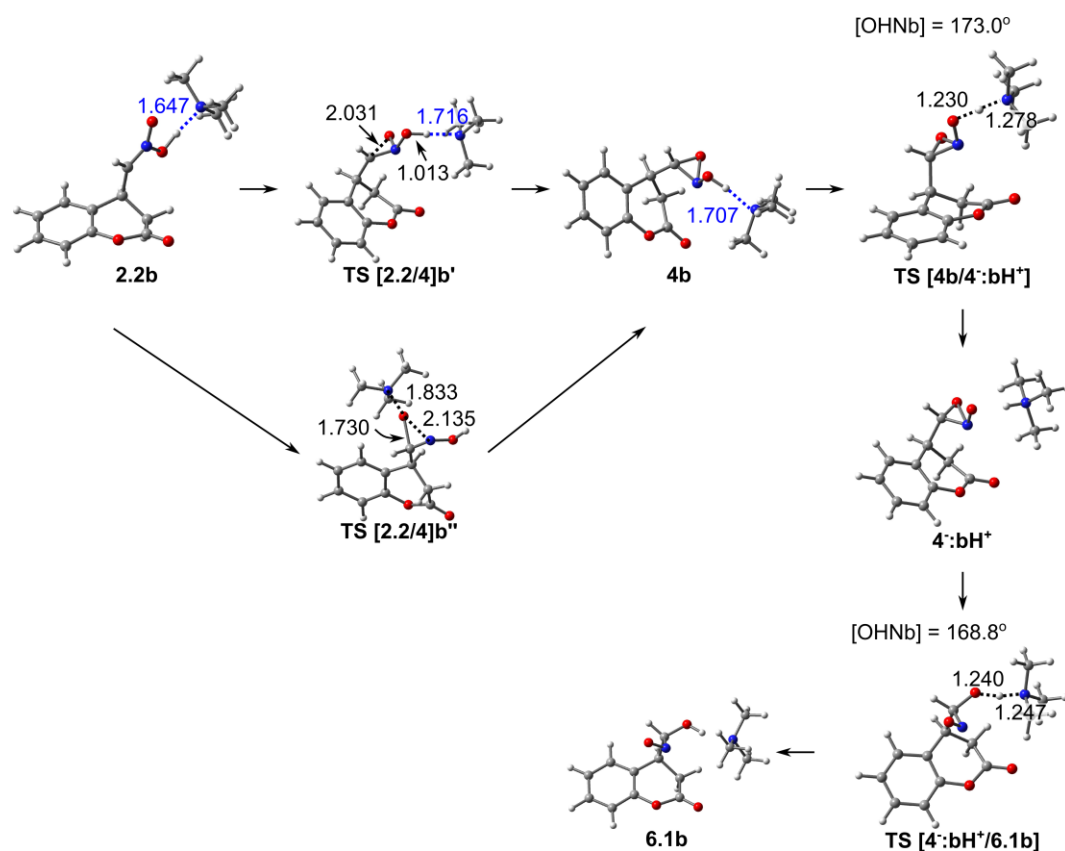

**Figure S4.** Structures of reaction complexes, transition states and intermediates for O-atom migration via formation of a three-membered oxaziridine cycle, assisted by trimethylamine. (only  $\sigma$ -skeleton is shown; interatomic distances in Å, angles in degrees).

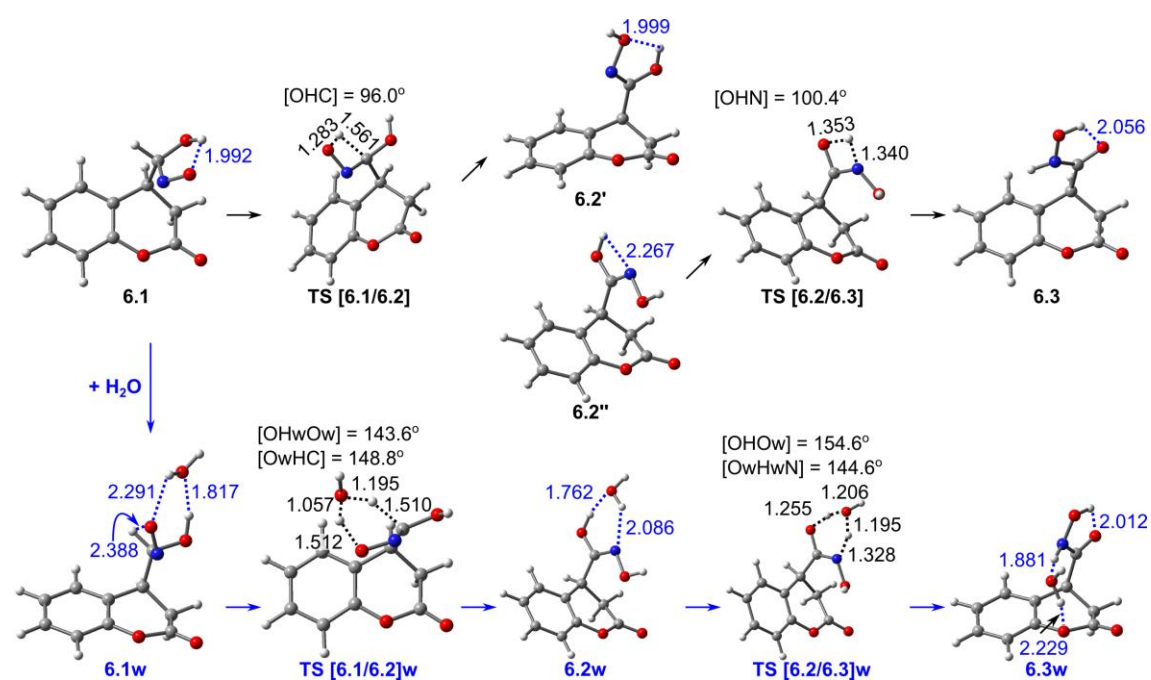

**Figure S5.** Structures of reaction complexes, transition states and intermediates for the transformation between different tautomeric forms of the nitrosohydroxymethyl group in intermediate **6**. (only  $\sigma$ -skeleton is shown; interatomic distances in Å, angles in degrees).

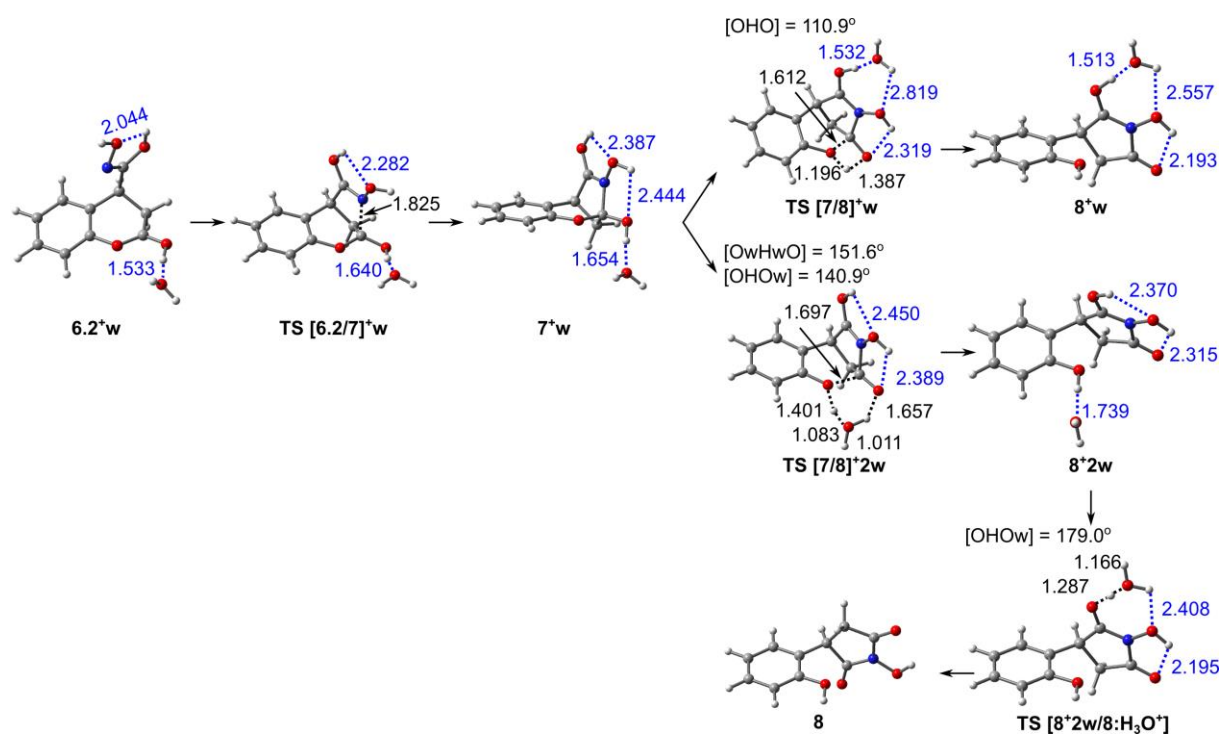

**Figure S6.** Structures of reaction complexes, transition states and intermediates for formation of pyrrolidine ring from intermediate **6.2**. (only  $\sigma$ -skeleton is shown; interatomic distances in Å, angles in degrees).

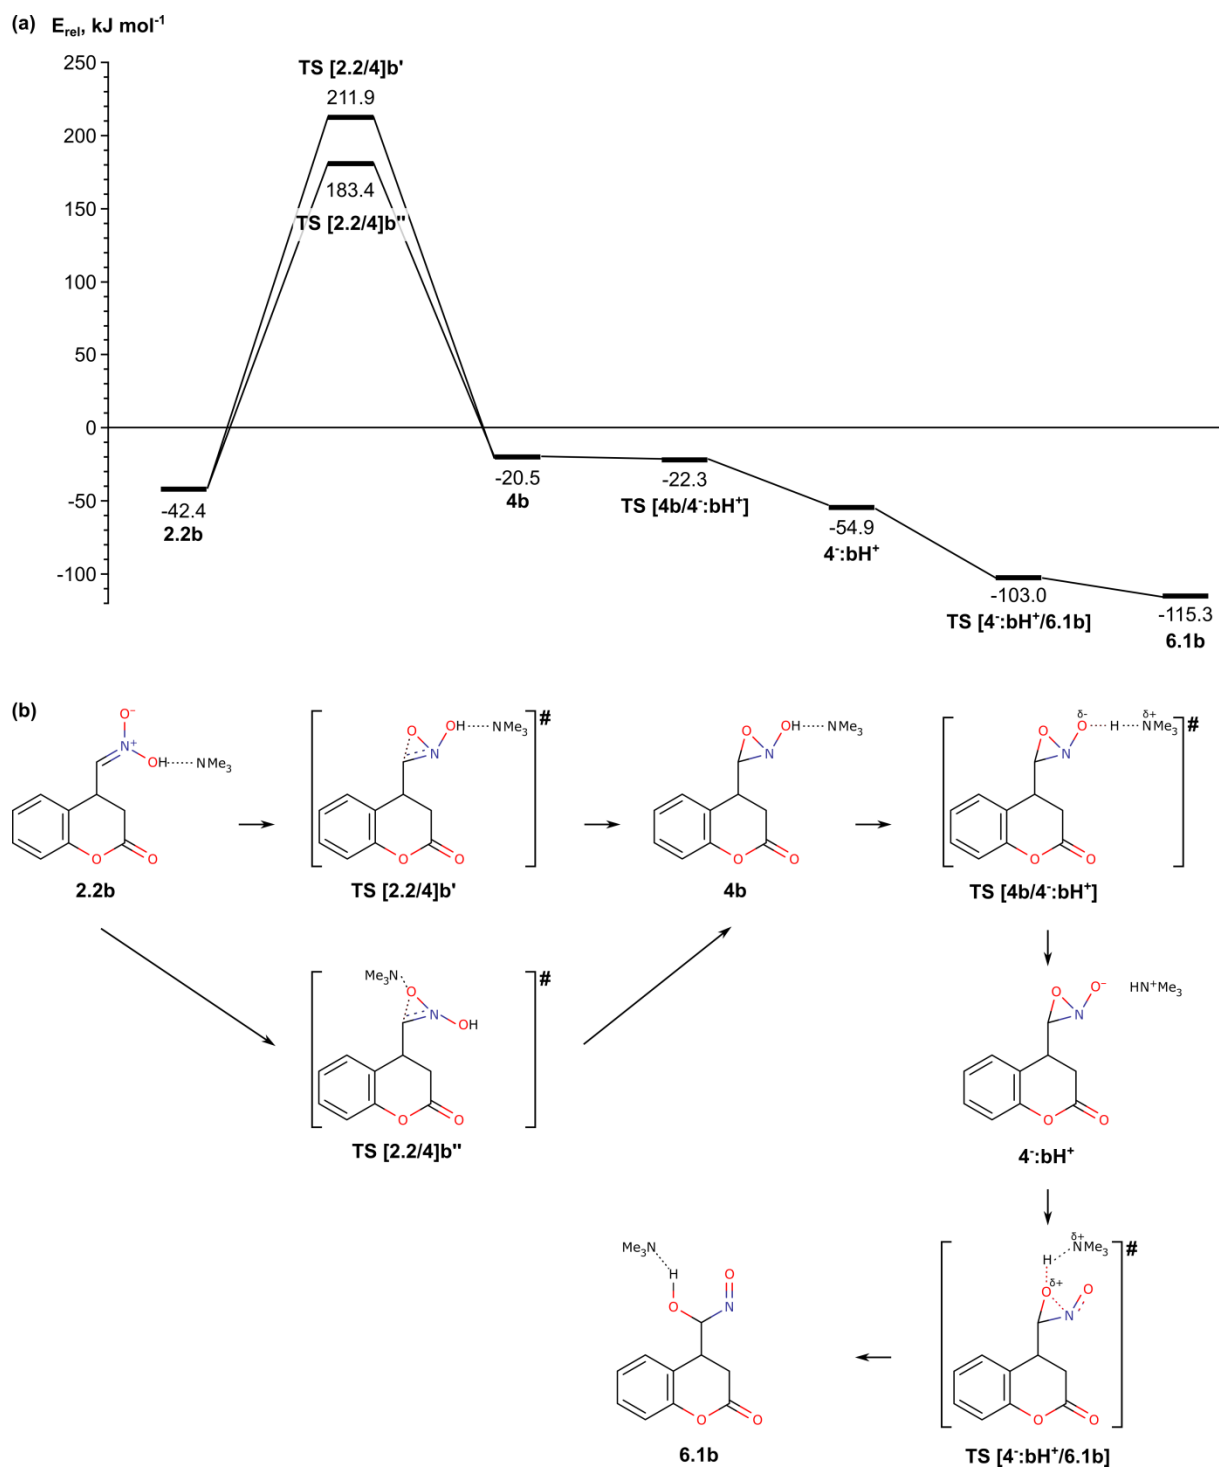

**Figure S7.** (a) Energy diagram of the mechanism for O-atom migration assisted by trimethylamine. (b) Schematic representation of the reaction paths.

## Tables

**Table S1.** Reaction and activation energies,  $E_{\text{rea}}$  and  $E_{\text{act}}$  (in kJ/mol), for various reaction steps calculated as single point energy at MP2/6-311+G\* level accounting the solvent effect by PCM. The corrections for the zero-point vibrational energy, ZPE (in kJ/mol), and entropy corrections,  $S_{\text{tot}}$  and  $S_{\text{vib}}$ , are obtained from frequency calculations at B3LYP/6-311+G\* level. T is equal to 298.15 K.

| Structure                        | $E_{\text{rea}}$ or $E_{\text{act}}$ | ZPE    | $T^*S_{\text{tot}}$ | $T^*S_{\text{vib}}$ | ZPE-TAS | E+ZPE-TAS |        |
|----------------------------------|--------------------------------------|--------|---------------------|---------------------|---------|-----------|--------|
| <b>Michael addition</b>          |                                      |        |                     |                     |         |           |        |
| <b>Neutral system</b>            |                                      |        |                     |                     |         |           |        |
|                                  | TS [RC 1/2]                          | 69.6   | -5.3                | -25.5               | -24.5   | 20.1      | 89.7   |
| 2.1                              |                                      | -166.7 | 13.3                | -20.0               | -19.1   | 33.2      | -133.4 |
|                                  | TS [2.1/2.2]                         | 307.6  | -17.1               | -3.4                | -3.4    | -13.7     | 293.9  |
| 2.2E                             |                                      | 97.3   | -3.7                | -0.5                | -0.6    | -3.3      | 94.0   |
| 2.2Z                             |                                      | 90.0   | -4.0                | -0.5                | -0.5    | -3.5      | 86.5   |
|                                  | TS [2.1/2.2]w                        | 197.8  | -14.6               | -13.1               | -13.1   | -1.5      | 196.3  |
| 2.2w                             |                                      | 88.9   | -3.5                | 1.5                 | 1.2     | -5.0      | 83.9   |
| <b>Negatively charged system</b> |                                      |        |                     |                     |         |           |        |
|                                  | TS [RC 1-/2.1-]                      | 21.7   | 1.8                 | -14.7               | -13.9   | 16.4      | 38.2   |
| 2.1-                             |                                      | -46.1  | 6.3                 | -14.9               | -14.1   | 21.2      | -24.9  |
| <b>Oxygen migration</b>          |                                      |        |                     |                     |         |           |        |
| <b>Neutral system</b>            |                                      |        |                     |                     |         |           |        |
|                                  | TS [2.2w/3.1]                        | 241.9  | -6.9                | -14.5               | -14.1   | 7.6       | 249.5  |
| 3.1                              |                                      | 16.6   | 11.1                | -13.5               | -13.0   | 24.5      | 41.1   |
|                                  | TS [3.1/6.1w]                        | 73.5   | -26.1               | -12.7               | -12.8   | -13.4     | 60.1   |
|                                  | TS [3.1/5+NH(OH)2]                   | 58.7   | -12.6               | -6.4                | -6.5    | -6.2      | 52.5   |
| 6.1w                             |                                      | -104.2 | -11.6               | 12.3                | 12.1    | -23.9     | -128.2 |
|                                  | TS [2.2w/3.2]w                       | 130.8  | 58.1                | -22.3               | -22.8   | 80.5      | 211.3  |
| 3.2w                             |                                      | -36.6  | 73.9                | 7.0                 | 6.3     | 66.8      | 30.3   |
|                                  | TS [3.2/6.1w]w                       | 142.4  | -9.0                | -30.0               | -29.8   | 21.1      | 163.5  |
| <b>Protonated system</b>         |                                      |        |                     |                     |         |           |        |
|                                  | TS [2.2+2w/3.1+]                     | 149.2  | 7.1                 | -10.2               | -9.4    | 17.3      | 166.6  |
| 3.1+                             |                                      | 1.3    | 15.2                | -19.0               | -18.2   | 34.2      | 35.4   |
|                                  | TS [3.1+/3.2+]                       | 90.1   | -13.7               | -5.6                | -5.5    | -8.2      | 81.9   |
|                                  | TS [2.2+w/3.2+]                      | 101.5  | -1.0                | -20.6               | -20.4   | 19.6      | 121.2  |
| 3.2+                             |                                      | 27.0   | 9.9                 | -7.6                | -7.5    | 17.5      | 44.5   |
| <b>Nef reaction</b>              |                                      |        |                     |                     |         |           |        |
|                                  | TS [2.2/4']                          | 164.0  | -6.9                | -6.0                | -6.0    | -0.8      | 163.2  |
|                                  | TS [2.2/4'']                         | 261.8  | -8.4                | -1.3                | -1.0    | -7.1      | 254.8  |
| 4'                               |                                      | 35.5   | -0.2                | -2.7                | -2.5    | 2.5       | 38.0   |
| 4''                              |                                      | 29.0   | 0.0                 | -2.7                | -2.5    | 2.7       | 31.8   |
|                                  | TS [4'/5+(NOH)2]                     | 149.5  | -8.5                | -4.8                | -5.0    | -3.6      | 145.8  |
|                                  | TS [4''/6.3]                         | 151.8  | -8.3                | -2.0                | -1.7    | -6.3      | 145.5  |

|                                   |                      |        |       |       |       |       |        |
|-----------------------------------|----------------------|--------|-------|-------|-------|-------|--------|
|                                   | TS [4"/6.1]w         | 99.5   | -10.6 | -3.8  | -3.6  | -6.8  | 92.6   |
| 6.3                               |                      | -220.8 | 2.1   | 3.0   | 3.1   | -0.9  | -221.7 |
| <b>Base assisted Nef reaction</b> |                      |        |       |       |       |       |        |
|                                   | TS [2.2/4]b'         | 254.3  | -6.6  | -0.4  | 0.1   | -6.2  | 248.1  |
|                                   | TS [2.2/4]b''        | 225.8  | -2.0  | -8.9  | -8.3  | 6.9   | 232.7  |
| 4b                                |                      | 21.8   | 0.3   | -1.0  | -0.6  | 1.3   | 23.2   |
|                                   | TS [4b/4-:bH+]       | -1.8   | -9.1  | -5.9  | -5.7  | -3.1  | -4.9   |
| 4-:bH+                            |                      | -34.4  | 3.7   | -21.9 | -21.7 | 25.7  | -8.7   |
|                                   | TS [4-:bH+/6.1b]     | -48.1  | -14.2 | 19.5  | 19.8  | -33.7 | -81.8  |
|                                   | TS [4-:bH+/6.2-:bH+] | 276.8  | -17.2 | 18.0  | 17.7  | -35.2 | 241.5  |
| 6.1b                              |                      | -60.4  | -5.0  | 25.5  | 25.7  | -30.5 | -90.9  |
| <b>Tautomerisation of 6</b>       |                      |        |       |       |       |       |        |
|                                   | TS [6.1/6.2]         | 335.9  | -19.6 | -11.2 | -11.3 | -8.5  | 327.4  |
| 6.2'                              |                      | -88.4  | 3.8   | 0.9   | 0.8   | 2.9   | -85.5  |
| 6.2''                             |                      | -69.2  | 4.3   | -0.9  | -0.8  | 5.3   | -63.9  |
|                                   | TS [6.2/6.3]         | 174.5  | -17.3 | -6.3  | -6.3  | -11.0 | 163.4  |
| 6.3                               |                      | -39.6  | -0.8  | 3.2   | 3.0   | -4.1  | -43.6  |
|                                   | TS [6.1/6.2]w        | 178.4  | -27.1 | -28.2 | -27.7 | 1.1   | 179.5  |
| 6.2w                              |                      | -79.9  | 4.8   | -5.5  | -5.4  | 10.3  | -69.7  |
|                                   | TS [6.2/6.3]w        | 87.4   | -31.7 | -22.9 | -22.6 | -8.9  | 78.6   |
| 6.3w                              |                      | -37.8  | -1.4  | 2.3   | 2.6   | -3.8  | -41.6  |
| <b>Cyclization</b>                |                      |        |       |       |       |       |        |
|                                   | TS [6.2/7]+w         | 11.9   | -1.5  | -16.4 | -16.0 | 15.0  | 26.9   |
| 7+w                               |                      | -2.1   | 3.7   | -9.1  | -8.6  | 12.8  | 10.7   |
|                                   | TS [7/8]+w           | 199.4  | -15.5 | -24.1 | -23.8 | 8.5   | 208.0  |
|                                   | TS [7/8]+2w          | 84.8   | -7.9  | -9.8  | -9.6  | 1.9   | 86.8   |
| 8+w                               |                      | -36.2  | -2.0  | -8.4  | -8.4  | 6.4   | -29.8  |
| 8+2w                              |                      | -18.6  | -4.6  | 10.3  | 10.0  | -14.9 | -33.5  |
|                                   | TS [8+2w/8:H3O+]     | -12.6  | -11.4 | -5.9  | -5.8  | -5.5  | -18.1  |
| 8                                 |                      | -62.9  | -96.8 | -22.6 | -21.3 | -74.2 | -137.2 |

<sup>a</sup> Activation energy,  $E_{\text{act}}$ , and reaction energy,  $E_{\text{rea}}$ , of the corresponding reaction step.

<sup>b</sup> In entropy  $S_{\text{tot}}$  all degrees of freedom are included, while in  $S_{\text{vib}}$  only vibrational degrees of freedom are taken into account.



**Table S2.** Reaction and activation energies,  $E_{\text{rea}}$  and  $E_{\text{act}}$  (in kJ/mol), for various reaction steps in the case of the *ethyl ester of 3-coumarin-carboxylic acid* calculated as single point energy at MP2/6-311+G\* level accounting the solvent effect by PCM.

| Structure                                  | Erel <sup>a</sup> | Erea <sup>b</sup> Eact <sup>b</sup> |
|--------------------------------------------|-------------------|-------------------------------------|
| <b>I. Michael addition</b>                 |                   |                                     |
| 2.1                                        | -88.7             | -                                   |
| TS [2.1/2.2]                               | 218.0             | 306.7                               |
| 2.2E                                       | 5.8               | 94.5                                |
| 2.2Z                                       | -1.4              | 87.3                                |
| 2.1w                                       | -107.4            |                                     |
| TS [2.1/2.2]w                              | 87.4              | 194.8                               |
| 2.2w                                       | -                 | -                                   |
| <b>II. Oxygen migration</b>                |                   |                                     |
| <i>Protonated system</i>                   |                   |                                     |
| 2.2 <sup>+</sup> w                         | 58.5              |                                     |
| 2.2 <sup>+</sup> 2w                        | 50.1              |                                     |
| TS [2.2 <sup>+</sup> 2w/3.1 <sup>+</sup> ] | 208.4             | 158.4                               |
| 3.1 <sup>+</sup>                           | 62.0              | 11.9                                |
| TS [3.1 <sup>+</sup> /3.2 <sup>+</sup> ]   | 164.1             | 102.1                               |
| TS [2.2 <sup>+</sup> w/3.2 <sup>+</sup> ]  | 144.7             | 86.2                                |
| 3.2 <sup>+</sup>                           | 90.1              | 31.6                                |
| <i>Nef reaction</i>                        |                   |                                     |
| TS [2.2/4']                                | 277.1             | 271.4                               |
| TS [2.2/4'']                               | 264.9             | 266.3                               |
| 4'                                         | 43.8              | 38.1                                |
| 4''                                        | 31.2              | 32.6                                |
| <i>Tautomerisation of 6</i>                |                   |                                     |
| 6.1                                        | -80.7             |                                     |
| TS [6.1/6.2]                               | 252.5             | 333.2                               |
| 6.2'                                       | -171.1            | -90.3                               |
| 6.2''                                      | -146.4            | -65.7                               |
| TS [6.2/6.3]                               | 24.9              | 171.3                               |
| 6.3                                        | -190.7            | -44.2                               |
| 6.1w                                       | -104.2            |                                     |
| TS [6.1/6.2]w                              | 69.9              | 174.1                               |
| 6.2w                                       | -182.5            | -78.2                               |
| TS [6.2/6.3]w                              | -94.9             | 87.5                                |
| 6.3w                                       | -223.5            | -41.0                               |
| <b>III. Cyclization</b>                    |                   |                                     |
| 6.2 <sup>+</sup> w                         | -108.0            |                                     |
| TS [6.2/7] <sup>+</sup> w                  | -116.1            | -                                   |
| 7 <sup>+</sup> w                           | -116.8            | -8.8                                |
| TS [7/8] <sup>+</sup> w                    | 85.1              | 201.9                               |

|                                                          |        |       |
|----------------------------------------------------------|--------|-------|
| <b>TS [7/8]<sup>+</sup>2w</b>                            | -49.9  | 67.0  |
| <b>8<sup>+</sup>w</b>                                    | -      | -     |
| <b>8<sup>+</sup>2w</b>                                   | -123.9 | -7.1  |
| <b>TS [8<sup>+</sup>2w/8:H<sub>3</sub>O<sup>+</sup>]</b> | -134.4 | -     |
| <b>8</b>                                                 | -199.4 | -75.5 |

<sup>a</sup> Relative energy of the species,  $E_{\text{rel}}$ , with respect to the energy of **1** and nitromethane at the corresponding level.

<sup>b</sup> Activation energy,  $E_{\text{act}}$ , and reaction energy,  $E_{\text{rea}}$ , of the corresponding reaction step.

## Description of the results obtained for the mechanism of the Nef rearrangement assisted by triethylamine

In recent experimental studies, we showed that the final product of the new rearrangement, pyrrolidinedion derivative, could be synthesized also in basic media in presence of triethylamine. By this reason, we modeled O-migration, in which such a base (with trimethylamine as a model) can influence the process of oxygen migration in the three-membered transition state **TS [2.2/4]b** (Fig. S4, S7):

- forming hydrogen bonds between the NOH group and the base in the transition state **TS [2.2/4]b'**;
- coordination of the nitrogen atom from the amine to the migrating oxygen atom from  $\text{CH}_2\text{NO}_2\text{H}$  in the transition state **TS [2.2/4]b''**.

The former approach is based on the basic properties of trialkylamine, while the latter one is connected with the possible formation of trialkylamino N-oxide. The formation of hydrogen bond stabilizes the starting compound **2.2b** by  $57.1 \text{ kJ mol}^{-1}$  with respect to **2.2Z**, while the stabilization of the transition state **TS [2.2/4]b'** is weaker and the energy barrier of the reaction step,  $254.3 \text{ kJ mol}^{-1}$ , increases compared to the reaction without amine,  $167.5 (164.1) \text{ kJ mol}^{-1}$ . The transfer of O atom coordinated to N atom from  $\text{Me}_3\text{N}$  through **TS [2.2/4]b''** has a slightly lower energy barrier,  $225.8 \text{ kJ mol}^{-1}$ , which is still by  $\sim 60 \text{ kJ mol}^{-1}$  higher than the barrier of the reaction without amine.

The reaction step via the presumed transition state **pseudoTS [4b/4:bH<sup>+</sup>]** (which has lower energy than the preceding intermediate) instead of the neutral complex **4b** spontaneously leads to formation of the ionic couple **4<sup>-</sup>:bH<sup>+</sup>**, in which the NOH group of **4** is deprotonated and the amine is protonated. The formation of the ionic couple leads to the opening of the three-centered ring and complete migration of the oxygen atom to the carbon atom, which was not possible to achieve in absence of the base (see above). The intermediate **6.1** can be easily obtained from **[4<sup>-</sup>:bH<sup>+</sup>]** by reverse protonation of **4<sup>-</sup>** from the protonated base. This process is spontaneous via the structure denoted as **TS [4<sup>-</sup>:bH<sup>+</sup>/6.1b]** (Figs. S4, S7).

| Intermediate                      | Transition state     | $E_{\text{rel}}^{\text{a}}$ |        | $E_{\text{act}}^{\text{b}}$ or $E_{\text{rea}}^{\text{b}}$ |        |
|-----------------------------------|----------------------|-----------------------------|--------|------------------------------------------------------------|--------|
|                                   |                      | L1                          | L2 PCM | L1                                                         | L2 PCM |
| <i>Base assisted Nef reaction</i> |                      |                             |        |                                                            |        |
| <b>2.2b</b>                       |                      | -9.4                        | -42.4  |                                                            |        |
|                                   | <b>TS [2.2/4]b'</b>  | 234.6                       | 211.9  | 243.9                                                      | 254.3  |
|                                   | <b>TS [2.2/4]b''</b> | 232.9                       | 183.4  | 242.3                                                      | 225.8  |
| <b>4b</b>                         |                      | 36.3                        | -20.5  | 45.6                                                       | 21.8   |

|                                                 |       |        |       |       |
|-------------------------------------------------|-------|--------|-------|-------|
| <b>pseudoTS [4b/4:bH<sup>+</sup>]</b>           | 49.2  | -22.3  | 12.9  | -1.8  |
| <b>4:bH<sup>+</sup></b>                         | 37.5  | -54.9  | 1.2   | -34.4 |
| <b>pseudoTS [4:bH<sup>+</sup>/6.1b]</b>         | -24.6 | -103.0 | -62.1 | -48.1 |
| <b>TS [4:bH<sup>+</sup>/6.2:bH<sup>+</sup>]</b> | 323.3 | 221.8  | 285.8 | 276.8 |
| <b>6.1b</b>                                     | -49.0 | -115.3 | -86.4 | -60.4 |

<sup>a</sup> Relative energy of the species,  $E_{\text{rel}}$ , with respect to the energy of **1** and nitromethane at the corresponding level.

<sup>b</sup> Activation energy,  $E_{\text{act}}$ , and reaction energy,  $E_{\text{rea}}$ , of the corresponding reaction step.

## TS structures (Energies at L1)

| TS [RC 1/2]  |                                       |          |          |
|--------------|---------------------------------------|----------|----------|
| -742.1602358 | ImgFreq/IR Inten: -851.5222/12.3334   |          |          |
| O            | -0.91305                              | 1.77920  | -0.37935 |
| C            | 0.29198                               | 2.09008  | 0.26751  |
| O            | 0.62625                               | 3.24331  | 0.28722  |
| C            | 1.03737                               | 0.96203  | 0.81543  |
| C            | 0.49231                               | -0.35913 | 0.81706  |
| C            | -0.91502                              | -0.50894 | 0.41735  |
| C            | -1.64923                              | -1.68757 | 0.61692  |
| H            | -1.17036                              | -2.53408 | 1.10083  |
| C            | -2.97341                              | -1.77691 | 0.21294  |
| H            | -3.53217                              | -2.69128 | 0.37821  |
| C            | -3.58424                              | -0.67988 | -0.40529 |
| H            | -4.61850                              | -0.74483 | -0.72586 |
| C            | -2.88090                              | 0.50124  | -0.60122 |
| H            | -3.33971                              | 1.36916  | -1.06033 |
| C            | -1.55200                              | 0.58382  | -0.18457 |
| C            | 1.38266                               | -1.44969 | -0.60819 |
| H            | 0.90799                               | -1.05713 | -1.49523 |
| N            | 2.68510                               | -1.06404 | -0.45595 |
| O            | 2.90174                               | 0.19732  | -0.84144 |
| O            | 3.52146                               | -1.65182 | 0.22209  |
| H            | 1.76679                               | 1.23321  | 1.57142  |
| H            | 0.83484                               | -1.01504 | 1.61442  |
| H            | 1.19675                               | -2.48151 | -0.34092 |
| H            | 2.17026                               | 0.77539  | -0.24679 |
| TS [2.1/2.2] |                                       |          |          |
| -742.1354092 | ImgFreq/IR inten: -2172.6740/541.3399 |          |          |
| O            | -0.93507                              | 1.76505  | -0.38671 |
| C            | 0.26798                               | 2.03500  | 0.22386  |
| O            | 0.81958                               | 3.06676  | -0.02672 |
| C            | 0.76377                               | 0.98993  | 1.20026  |
| H            | 1.81734                               | 1.19002  | 1.39487  |
| H            | 0.22714                               | 1.13886  | 2.14496  |
| C            | 0.51107                               | -0.44375 | 0.69795  |
| H            | 0.73051                               | -1.13868 | 1.51859  |
| C            | -0.95024                              | -0.56222 | 0.32723  |
| C            | -1.68598                              | -1.74050 | 0.47044  |
| H            | -1.19747                              | -2.62198 | 0.87642  |
| C            | -3.02946                              | -1.79540 | 0.10852  |
| H            | -3.58639                              | -2.71823 | 0.22826  |
| C            | -3.65518                              | -0.65702 | -0.40127 |
| H            | -4.70202                              | -0.68998 | -0.68358 |
| C            | -2.94243                              | 0.52875  | -0.54609 |

|   |          |          |          |
|---|----------|----------|----------|
| H | -3.40495 | 1.42712  | -0.93846 |
| C | -1.59919 | 0.56355  | -0.18255 |
| C | 1.38161  | -0.78999 | -0.49738 |
| O | 3.38314  | -1.17242 | 0.76573  |
| N | 2.77604  | -0.96737 | -0.24740 |
| O | 3.36489  | -0.73586 | -1.41052 |
| H | 1.04620  | -1.64942 | -1.08034 |
| H | 2.20515  | -0.32454 | -1.66911 |

**TS [2.1/2.2]w**

-818.6264588

ImgFreq/IR inten: -1393.6794/102.5452

|   |          |          |          |
|---|----------|----------|----------|
| O | 1.14768  | 1.75540  | 0.29575  |
| C | 0.03690  | 2.05236  | -0.46764 |
| O | -0.50648 | 3.10406  | -0.29021 |
| C | -0.37106 | 1.00513  | -1.47838 |
| H | -1.38849 | 1.22155  | -1.79920 |
| H | 0.27915  | 1.12046  | -2.35426 |
| C | -0.22315 | -0.42561 | -0.92521 |
| H | -0.37086 | -1.12202 | -1.75860 |
| C | 1.18395  | -0.57685 | -0.39264 |
| C | 1.89989  | -1.77497 | -0.44065 |
| H | 1.43425  | -2.64880 | -0.88758 |
| C | 3.19439  | -1.85896 | 0.06656  |
| H | 3.73643  | -2.79712 | 0.01763  |
| C | 3.79179  | -0.73031 | 0.62921  |
| H | 4.80139  | -0.78550 | 1.02226  |
| C | 3.09859  | 0.47503  | 0.68333  |
| H | 3.54039  | 1.36748  | 1.11180  |
| C | 1.80437  | 0.53731  | 0.17447  |
| C | -1.22917 | -0.74303 | 0.16940  |
| O | -2.90162 | -0.90904 | -1.40709 |
| N | -2.53355 | -1.01985 | -0.24705 |
| O | -3.40185 | -1.31705 | 0.68610  |
| H | -0.91988 | -1.47335 | 0.91370  |
| H | -1.72260 | 0.25790  | 1.37339  |
| H | -3.10688 | -0.41850 | 1.69101  |
| O | -2.52133 | 0.41952  | 2.12461  |
| H | -2.19818 | 0.23309  | 3.01520  |

**TS [RC 1/2.1]**

-741.6739479

ImgFreq/IR inten: -271.0039/625.5705

|   |          |          |          |
|---|----------|----------|----------|
| O | -2.30114 | -0.60008 | 0.39959  |
| C | -1.86759 | -1.89151 | -0.03477 |
| O | -2.67164 | -2.79038 | 0.14735  |
| C | -0.58470 | -1.94884 | -0.62933 |
| C | 0.29418  | -0.85764 | -0.68196 |
| C | -0.28475 | 0.46315  | -0.41935 |
| C | 0.38019  | 1.67012  | -0.68385 |

|   |          |          |          |
|---|----------|----------|----------|
| H | 1.38970  | 1.63524  | -1.07700 |
| C | -0.22082 | 2.89416  | -0.41517 |
| H | 0.31508  | 3.81607  | -0.61809 |
| C | -1.50695 | 2.93111  | 0.13184  |
| H | -1.98143 | 3.88438  | 0.34799  |
| C | -2.18730 | 1.74911  | 0.40070  |
| H | -3.18895 | 1.75005  | 0.81756  |
| C | -1.57981 | 0.52119  | 0.12351  |
| C | 1.78323  | -1.07227 | 0.84527  |
| H | 1.35299  | -0.64073 | 1.73858  |
| N | 2.89423  | -0.39996 | 0.36870  |
| O | 3.57808  | -0.94457 | -0.54179 |
| O | 3.11813  | 0.78186  | 0.74273  |
| H | -0.26915 | -2.92858 | -0.96867 |
| H | 1.11813  | -0.89708 | -1.38962 |
| H | 1.86258  | -2.14574 | 0.76395  |

**TS [2.2w/3.1]**

-818.5707078

ImgFreq/IR inten: -811.7078/529.1724

|   |          |          |          |
|---|----------|----------|----------|
| O | -1.23896 | 1.76540  | -0.60328 |
| C | -0.09207 | 2.24717  | -0.00874 |
| O | 0.32308  | 3.31461  | -0.35253 |
| C | 0.53024  | 1.36696  | 1.05444  |
| H | -0.00419 | 1.56128  | 1.99130  |
| H | 1.56373  | 1.67220  | 1.19691  |
| C | 0.41234  | -0.13677 | 0.73799  |
| H | 0.71917  | -0.70413 | 1.62138  |
| C | -1.03414 | -0.43836 | 0.40860  |
| C | -1.66596 | -1.63913 | 0.74200  |
| H | -1.09841 | -2.41116 | 1.25259  |
| C | -3.00523 | -1.85515 | 0.43154  |
| H | -3.47863 | -2.79358 | 0.69857  |
| C | -3.73523 | -0.85901 | -0.21855 |
| H | -4.77985 | -1.01902 | -0.46299 |
| C | -3.13062 | 0.34979  | -0.54698 |
| H | -3.67624 | 1.14455  | -1.04249 |
| C | -1.79045 | 0.54762  | -0.22802 |
| C | 1.36866  | -0.50816 | -0.38946 |
| N | 2.76579  | -0.90564 | -0.01262 |
| O | 3.24154  | -0.00877 | 1.05793  |
| O | 3.55772  | -0.85650 | -1.06593 |
| H | 1.35100  | 0.12339  | -1.27696 |
| H | 4.06540  | 0.30857  | 0.64899  |
| O | 1.05941  | -1.93234 | -0.84229 |
| H | 1.36676  | -2.01521 | -1.76487 |
| H | 1.92324  | -2.23647 | -0.22220 |

| <b>TS [3.1/6.1]w</b>                 |                                              |          |          |
|--------------------------------------|----------------------------------------------|----------|----------|
| <b>-818.6414856</b>                  | <b>ImgFreq/IR inten: -752.8107/81.5313</b>   |          |          |
| O                                    | -1.35687                                     | 1.72360  | -0.62448 |
| C                                    | -0.24951                                     | 2.26070  | -0.02374 |
| O                                    | 0.16926                                      | 3.31463  | -0.40952 |
| C                                    | 0.33810                                      | 1.45447  | 1.11586  |
| H                                    | -0.28782                                     | 1.63583  | 1.99693  |
| H                                    | 1.32248                                      | 1.86363  | 1.34019  |
| C                                    | 0.34118                                      | -0.05841 | 0.83804  |
| H                                    | 0.62200                                      | -0.59102 | 1.74969  |
| C                                    | -1.05746                                     | -0.45917 | 0.42311  |
| C                                    | -1.61125                                     | -1.71043 | 0.70427  |
| H                                    | -1.00502                                     | -2.44724 | 1.21961  |
| C                                    | -2.91163                                     | -2.01893 | 0.31754  |
| H                                    | -3.32491                                     | -2.99607 | 0.54203  |
| C                                    | -3.67881                                     | -1.07066 | -0.36074 |
| H                                    | -4.69340                                     | -1.30475 | -0.66483 |
| C                                    | -3.14701                                     | 0.18102  | -0.65205 |
| H                                    | -3.71824                                     | 0.93520  | -1.18094 |
| C                                    | -1.84432                                     | 0.47039  | -0.25951 |
| C                                    | 1.35147                                      | -0.47925 | -0.23870 |
| N                                    | 2.77682                                      | -0.03210 | 0.18164  |
| O                                    | 3.57954                                      | -1.10807 | -1.53866 |
| O                                    | 3.17865                                      | -0.20706 | 1.30294  |
| H                                    | 1.21402                                      | 0.05631  | -1.18605 |
| H                                    | 4.41599                                      | -1.53966 | -1.31310 |
| O                                    | 1.34422                                      | -1.84391 | -0.39229 |
| H                                    | 2.08115                                      | -2.02235 | -1.02591 |
| H                                    | 3.43293                                      | 0.18294  | -0.63743 |
| <b>TS [3.1/5+NH(OH)<sub>2</sub>]</b> |                                              |          |          |
| <b>-818.6452361</b>                  | <b>ImgFreq/IR inten: -1142.8770/826.7598</b> |          |          |
| O                                    | -1.39874                                     | 1.79977  | -0.42400 |
| C                                    | -0.23620                                     | 2.23703  | 0.14844  |
| O                                    | 0.17411                                      | 3.32826  | -0.12640 |
| C                                    | 0.42079                                      | 1.29042  | 1.13443  |
| H                                    | -0.09382                                     | 1.42689  | 2.09273  |
| H                                    | 1.44305                                      | 1.64600  | 1.27278  |
| C                                    | 0.32466                                      | -0.18992 | 0.72980  |
| H                                    | 0.60685                                      | -0.82219 | 1.57865  |
| C                                    | -1.11253                                     | -0.49242 | 0.36328  |
| C                                    | -1.69101                                     | -1.75274 | 0.53364  |
| H                                    | -1.08263                                     | -2.55805 | 0.93057  |
| C                                    | -3.01805                                     | -1.98365 | 0.18555  |
| H                                    | -3.44934                                     | -2.96918 | 0.32305  |
| C                                    | -3.78859                                     | -0.94677 | -0.34256 |
| H                                    | -4.82423                                     | -1.11929 | -0.61543 |



|                                                                        |          |          |          |
|------------------------------------------------------------------------|----------|----------|----------|
| C                                                                      | -3.23210 | 0.31488  | -0.52319 |
| H                                                                      | -3.80448 | 1.13784  | -0.93546 |
| C                                                                      | -1.90244 | 0.52534  | -0.17245 |
| C                                                                      | 1.25197  | -0.57052 | -0.43784 |
| N                                                                      | 2.94728  | -0.38843 | 0.21179  |
| O                                                                      | 3.66053  | 0.48563  | -0.66475 |
| O                                                                      | 3.40616  | -1.63819 | 0.18479  |
| H                                                                      | 1.31960  | 0.18398  | -1.23338 |
| H                                                                      | 4.49569  | 0.01432  | -0.82750 |
| O                                                                      | 1.30268  | -1.81604 | -0.78827 |
| H                                                                      | 2.45192  | -2.09338 | -0.38127 |
| H                                                                      | 3.04947  | 0.00680  | 1.14707  |
| <b>TS [2.2w/3.2]w</b>                                                  |          |          |          |
| -895.0662618                      ImgFreq/IR inten: -784.3438/640.9200 |          |          |          |
| O                                                                      | -1.83800 | 1.63691  | -0.45776 |
| C                                                                      | -0.84715 | 2.30122  | 0.23886  |
| O                                                                      | -0.70208 | 3.47054  | 0.04190  |
| C                                                                      | -0.05150 | 1.47029  | 1.22423  |
| H                                                                      | -0.62514 | 1.45038  | 2.15826  |
| H                                                                      | 0.88241  | 1.99263  | 1.41599  |
| C                                                                      | 0.15977  | 0.01549  | 0.76338  |
| H                                                                      | 0.56903  | -0.55063 | 1.60653  |
| C                                                                      | -1.18226 | -0.55699 | 0.36283  |
| C                                                                      | -1.54612 | -1.89059 | 0.56307  |
| H                                                                      | -0.83675 | -2.57003 | 1.02598  |
| C                                                                      | -2.80007 | -2.35815 | 0.18114  |
| H                                                                      | -3.06404 | -3.39730 | 0.34427  |
| C                                                                      | -3.71400 | -1.48448 | -0.40928 |
| H                                                                      | -4.69348 | -1.84065 | -0.71003 |
| C                                                                      | -3.37825 | -0.14924 | -0.60677 |
| H                                                                      | -4.07190 | 0.55314  | -1.05439 |
| C                                                                      | -2.11983 | 0.29989  | -0.21650 |
| C                                                                      | 1.18725  | -0.07822 | -0.36449 |
| N                                                                      | 2.56259  | 0.32998  | 0.05459  |
| O                                                                      | 2.62278  | 1.74601  | -0.17236 |
| O                                                                      | 3.44785  | -0.28516 | -0.83293 |
| H                                                                      | 0.88094  | 0.44140  | -1.27924 |
| H                                                                      | 3.02925  | 1.81289  | -1.05662 |
| O                                                                      | 1.35272  | -1.48937 | -0.76321 |
| H                                                                      | 2.08864  | -1.35379 | -1.43341 |
| H                                                                      | 2.01352  | -2.02178 | 0.00889  |
| H                                                                      | 3.65624  | -1.55583 | 0.05575  |
| O                                                                      | 3.19966  | -2.37470 | 0.51533  |
| H                                                                      | 3.32267  | -2.31942 | 1.46920  |

| <b>TS [3.2/6.1w]w</b>   |                                        |          |          |
|-------------------------|----------------------------------------|----------|----------|
| -895.0882589            | ImgFreq/IR inten: -1326.5756/194.2267  |          |          |
| O                       | -1.48825                               | 1.78215  | -0.57039 |
| C                       | -0.31750                               | 2.11766  | 0.06492  |
| O                       | 0.28456                                | 3.08227  | -0.31896 |
| C                       | 0.09435                                | 1.20919  | 1.20043  |
| H                       | -0.56392                               | 1.42516  | 2.05020  |
| H                       | 1.11430                                | 1.45374  | 1.47898  |
| C                       | -0.08867                               | -0.27162 | 0.82358  |
| H                       | 0.11606                                | -0.89007 | 1.70152  |
| C                       | -1.53610                               | -0.44677 | 0.40838  |
| C                       | -2.28467                               | -1.59609 | 0.66944  |
| H                       | -1.80269                               | -2.43350 | 1.16200  |
| C                       | -3.62265                               | -1.68059 | 0.29480  |
| H                       | -4.18707                               | -2.58274 | 0.50497  |
| C                       | -4.23391                               | -0.60488 | -0.35052 |
| H                       | -5.27672                               | -0.66395 | -0.64391 |
| C                       | -3.50904                               | 0.55193  | -0.61821 |
| H                       | -3.95660                               | 1.40341  | -1.11802 |
| C                       | -2.17304                               | 0.61561  | -0.23583 |
| C                       | 0.86782                                | -0.77131 | -0.27462 |
| N                       | 2.29988                                | -0.85002 | 0.22790  |
| O                       | 2.84120                                | 0.88298  | 0.21210  |
| O                       | 3.00879                                | -1.42818 | -0.69996 |
| H                       | 0.85589                                | -0.14045 | -1.17620 |
| H                       | 2.57601                                | 1.28489  | -0.63179 |
| O                       | 0.49683                                | -2.08587 | -0.58100 |
| H                       | 1.14618                                | -2.43834 | -1.20610 |
| H                       | 4.21485                                | -1.08506 | -0.32812 |
| O                       | 4.94743                                | -0.30107 | 0.09120  |
| H                       | 4.14204                                | 0.45416  | 0.19975  |
| H                       | 5.61862                                | -0.03409 | -0.54661 |
| <b>TS [2.2+2w/3.1+]</b> |                                        |          |          |
| -818.9474032            | ImgFreq/IR inten: -1487.8898/1295.6481 |          |          |
| O                       | -1.11566                               | 1.83089  | -0.47678 |
| C                       | 0.04886                                | 2.18125  | 0.15878  |
| O                       | 0.59509                                | 3.20183  | -0.12798 |
| C                       | 0.56187                                | 1.19052  | 1.19283  |
| H                       | 0.00035                                | 1.34044  | 2.12032  |
| H                       | 1.59752                                | 1.46111  | 1.40391  |
| C                       | 0.35415                                | -0.27268 | 0.75347  |
| H                       | 0.62309                                | -0.95370 | 1.56382  |
| C                       | -1.10603                               | -0.44790 | 0.38187  |
| C                       | -1.82230                               | -1.62554 | 0.62004  |
| H                       | -1.32576                               | -2.46890 | 1.08998  |

|                       |          |                                       |          |
|-----------------------|----------|---------------------------------------|----------|
| C                     | -3.16875 | -1.71265                              | 0.27948  |
| H                     | -3.71814 | -2.62599                              | 0.47591  |
| C                     | -3.81183 | -0.61630                              | -0.29855 |
| H                     | -4.86240 | -0.67848                              | -0.55874 |
| C                     | -3.11841 | 0.56721                               | -0.53262 |
| H                     | -3.60015 | 1.43378                               | -0.96996 |
| C                     | -1.77326 | 0.63938                               | -0.18946 |
| C                     | 1.21741  | -0.60487                              | -0.45022 |
| N                     | 2.70824  | -0.85723                              | -0.26222 |
| O                     | 3.14975  | -0.99463                              | 1.04385  |
| O                     | 3.42057  | 0.12860                               | -0.94396 |
| H                     | 1.10531  | 0.06219                               | -1.30313 |
| H                     | 3.26225  | -0.09887                              | 1.41615  |
| O                     | 1.03074  | -2.01634                              | -0.89329 |
| H                     | 0.52177  | -2.15688                              | -1.70936 |
| H                     | 2.21889  | -2.04646                              | -0.83979 |
| H                     | 4.28554  | -0.26088                              | -1.16196 |
| <b>TS [3.1+/3.2+]</b> |          |                                       |          |
| -818.9847008          |          | ImgFreq/IR inten: -790.2056/1952.7991 |          |
| O                     | -0.88616 | 1.83313                               | -0.36178 |
| C                     | 0.27450  | 1.75721                               | 0.21731  |
| O                     | 1.28439  | 2.21150                               | -0.38698 |
| C                     | 0.41588  | 0.88812                               | 1.41642  |
| H                     | -0.37291 | 1.09468                               | 2.14204  |
| H                     | 1.38492  | 1.00944                               | 1.88939  |
| C                     | 0.18713  | -0.51735                              | 0.80402  |
| H                     | 0.33997  | -1.27948                              | 1.56857  |
| C                     | -1.25950 | -0.48516                              | 0.32770  |
| C                     | -2.13958 | -1.56318                              | 0.40072  |
| H                     | -1.78042 | -2.51918                              | 0.76726  |
| C                     | -3.47772 | -1.41404                              | 0.02973  |
| H                     | -4.14893 | -2.26226                              | 0.09742  |
| C                     | -3.95677 | -0.18233                              | -0.41011 |
| H                     | -4.99760 | -0.06908                              | -0.68964 |
| C                     | -3.10033 | 0.91646                               | -0.49809 |
| H                     | -3.44091 | 1.88186                               | -0.85311 |
| C                     | -1.78322 | 0.73458                               | -0.12876 |
| C                     | 1.18455  | -0.81044                              | -0.35991 |
| N                     | 2.47555  | -0.01764                              | -0.19098 |
| O                     | 3.33413  | -0.29883                              | -1.24724 |
| O                     | 3.06353  | -0.45020                              | 1.02359  |
| H                     | 0.80166  | -0.41951                              | -1.30653 |
| H                     | 3.49187  | -1.26396                              | -1.21847 |
| O                     | 1.47596  | -2.16603                              | -0.45459 |
| H                     | 1.21921  | -2.52498                              | -1.31264 |
| H                     | 2.06745  | 1.40283                               | -0.25442 |

|                                              |                                           |          |          |
|----------------------------------------------|-------------------------------------------|----------|----------|
| H                                            | 3.86240                                   | 0.09337  | 1.12889  |
| <b>TS [2.2<sup>+</sup>w/3.2<sup>+</sup>]</b> |                                           |          |          |
| -818.9805439                                 | ImgFreq/IR inten:<br>-1126.4281/2592.9207 |          |          |
| O                                            | -1.40383                                  | 1.81772  | -0.30938 |
| C                                            | -0.22882                                  | 2.05621  | 0.21438  |
| O                                            | 0.58681                                   | 2.76695  | -0.40433 |
| C                                            | 0.19405                                   | 1.23805  | 1.39307  |
| H                                            | -0.58407                                  | 1.21746  | 2.15753  |
| H                                            | 1.11336                                   | 1.62393  | 1.82670  |
| C                                            | 0.32699                                   | -0.17677 | 0.78394  |
| H                                            | 0.64066                                   | -0.86778 | 1.56517  |
| C                                            | -1.07151                                  | -0.53019 | 0.29225  |
| C                                            | -1.59882                                  | -1.82074 | 0.32963  |
| H                                            | -0.97016                                  | -2.64309 | 0.65525  |
| C                                            | -2.92665                                  | -2.05561 | -0.02792 |
| H                                            | -3.32096                                  | -3.06438 | 0.00893  |
| C                                            | -3.74906                                  | -0.99981 | -0.41574 |
| H                                            | -4.78288                                  | -1.18336 | -0.68408 |
| C                                            | -3.24973                                  | 0.30184  | -0.46528 |
| H                                            | -3.86218                                  | 1.13851  | -0.77981 |
| C                                            | -1.92895                                  | 0.50270  | -0.11402 |
| C                                            | 1.40460                                   | -0.21815 | -0.33980 |
| N                                            | 2.24356                                   | -1.36803 | -0.24042 |
| O                                            | 2.87272                                   | -1.47424 | 1.00485  |
| O                                            | 3.22626                                   | -1.21078 | -1.24854 |
| H                                            | 0.97946                                   | -0.21240 | -1.34147 |
| H                                            | 3.52669                                   | -0.75330 | 1.08057  |
| H                                            | 3.44291                                   | -2.10641 | -1.54853 |
| O                                            | 2.28222                                   | 1.04891  | -0.27308 |
| H                                            | 2.94264                                   | 0.99603  | -0.98604 |
| H                                            | 1.62353                                   | 2.05728  | -0.33038 |
| <b>TS [2.2/4']</b>                           |                                           |          |          |
| -742.1531741                                 | ImgFreq/IR inten: -106.9246/73.8740       |          |          |
| O                                            | 1.63521                                   | 1.67808  | -0.23923 |
| C                                            | 0.48239                                   | 2.35135  | 0.05631  |
| O                                            | 0.43611                                   | 3.53451  | -0.11618 |
| C                                            | -0.65024                                  | 1.52364  | 0.62899  |
| H                                            | -1.57025                                  | 2.09403  | 0.51745  |
| H                                            | -0.45003                                  | 1.40975  | 1.70220  |
| C                                            | -0.75716                                  | 0.12878  | -0.04307 |
| H                                            | -1.11317                                  | 0.25933  | -1.06771 |
| C                                            | 0.60883                                   | -0.52709 | -0.03366 |
| C                                            | 0.80697                                   | -1.90988 | 0.01753  |
| H                                            | -0.05697                                  | -2.56481 | 0.04224  |
| C                                            | 2.09190                                   | -2.44706 | 0.01218  |

|   |          |          |          |
|---|----------|----------|----------|
| H | 2.22573  | -3.52256 | 0.04958  |
| C | 3.19987  | -1.60257 | -0.04818 |
| H | 4.20306  | -2.01508 | -0.05300 |
| C | 3.02388  | -0.22403 | -0.11178 |
| H | 3.86513  | 0.45665  | -0.17357 |
| C | 1.73459  | 0.29653  | -0.10691 |
| C | -1.78458 | -0.63916 | 0.70611  |
| N | -3.15396 | -0.72851 | 0.32624  |
| O | -3.40095 | 0.25041  | -0.68479 |
| O | -2.62327 | -1.94979 | -0.29455 |
| H | -4.36318 | 0.23477  | -0.77085 |
| H | -1.57817 | -1.06110 | 1.68295  |

**TS [2.2/4']**

-742.1249367

ImgFreq/IR inten: -914.2135/43.8485

|   |          |          |          |
|---|----------|----------|----------|
| O | 0.49836  | 1.65963  | 0.58338  |
| C | -0.63987 | 1.89507  | -0.17301 |
| O | -1.31415 | 2.83917  | 0.10627  |
| C | -0.88889 | 0.94736  | -1.32687 |
| H | -0.33674 | 1.34084  | -2.18776 |
| H | -1.95145 | 0.97078  | -1.55856 |
| C | -0.41206 | -0.48333 | -1.05771 |
| H | -0.42184 | -1.05413 | -1.99385 |
| C | 1.00522  | -0.45683 | -0.50415 |
| C | 1.94641  | -1.46274 | -0.74056 |
| H | 1.67345  | -2.31012 | -1.36325 |
| C | 3.22443  | -1.38371 | -0.19750 |
| H | 3.94666  | -2.16853 | -0.39269 |
| C | 3.57244  | -0.28610 | 0.59289  |
| H | 4.56745  | -0.21657 | 1.01912  |
| C | 2.65223  | 0.72771  | 0.83354  |
| H | 2.90141  | 1.59199  | 1.43822  |
| C | 1.37379  | 0.63387  | 0.28742  |
| C | -1.23512 | -1.25756 | -0.07698 |
| N | -2.30925 | -0.76228 | 0.51158  |
| O | -2.73606 | -1.55987 | 1.59977  |
| O | -3.15332 | -0.79610 | -0.63028 |
| H | -3.28990 | -0.96359 | 2.12412  |
| H | -0.87442 | -2.23961 | 0.23810  |

**TS [4'/5+(NOH)<sub>2</sub>]**

-742.1536390

ImgFreq/IR inten: -170.4202/2.0477

|   |          |         |          |
|---|----------|---------|----------|
| O | 1.08385  | 1.81242 | 0.34357  |
| C | -0.17588 | 2.15954 | -0.08158 |
| O | -0.59639 | 3.24504 | 0.19834  |
| C | -0.90942 | 1.12950 | -0.91333 |
| H | -0.55001 | 1.24445 | -1.94294 |
| H | -1.96677 | 1.38901 | -0.90416 |

|                                                                        |          |          |          |
|------------------------------------------------------------------------|----------|----------|----------|
| C                                                                      | -0.66429 | -0.31765 | -0.46616 |
| H                                                                      | -1.04241 | -1.01040 | -1.22145 |
| C                                                                      | 0.82533  | -0.53069 | -0.28391 |
| C                                                                      | 1.44458  | -1.77027 | -0.46670 |
| H                                                                      | 0.83615  | -2.62441 | -0.74655 |
| C                                                                      | 2.81670  | -1.91752 | -0.28867 |
| H                                                                      | 3.28078  | -2.88659 | -0.43603 |
| C                                                                      | 3.59062  | -0.81571 | 0.07911  |
| H                                                                      | 4.66115  | -0.92224 | 0.21827  |
| C                                                                      | 2.99401  | 0.42603  | 0.27017  |
| H                                                                      | 3.57031  | 1.29720  | 0.55978  |
| C                                                                      | 1.61966  | 0.55426  | 0.09234  |
| C                                                                      | -1.36548 | -0.66617 | 0.84794  |
| N                                                                      | -3.48198 | -0.48570 | 0.45796  |
| O                                                                      | -3.73104 | -0.88929 | -0.71862 |
| O                                                                      | -1.71667 | -1.81003 | 1.13080  |
| H                                                                      | -4.43835 | -1.58056 | -0.72399 |
| H                                                                      | -1.34998 | 0.12041  | 1.62329  |
| <b>TS [4''/6.3]</b>                                                    |          |          |          |
| -742.1545510                      ImgFreq/IR inten: -593.5718/183.6230 |          |          |          |
| O                                                                      | 0.30364  | 1.75450  | 0.50909  |
| C                                                                      | -0.89761 | 1.91598  | -0.15770 |
| O                                                                      | -1.61976 | 2.80030  | 0.19533  |
| C                                                                      | -1.15424 | 0.99566  | -1.33055 |
| H                                                                      | -0.74045 | 1.50099  | -2.21137 |
| H                                                                      | -2.23288 | 0.92727  | -1.47034 |
| C                                                                      | -0.53632 | -0.39966 | -1.20136 |
| H                                                                      | -0.51161 | -0.86480 | -2.19020 |
| C                                                                      | 0.84523  | -0.33445 | -0.62288 |
| C                                                                      | 1.81640  | -1.31855 | -0.85527 |
| H                                                                      | 1.57349  | -2.15160 | -1.50872 |
| C                                                                      | 3.07812  | -1.23541 | -0.28053 |
| H                                                                      | 3.81709  | -2.00447 | -0.47702 |
| C                                                                      | 3.39218  | -0.15146 | 0.54576  |
| H                                                                      | 4.37596  | -0.07809 | 0.99697  |
| C                                                                      | 2.45069  | 0.83963  | 0.78950  |
| H                                                                      | 2.67024  | 1.69142  | 1.42272  |
| C                                                                      | 1.18657  | 0.74147  | 0.20868  |
| C                                                                      | -1.43227 | -1.36793 | -0.34640 |
| N                                                                      | -1.31381 | -0.87066 | 1.07574  |
| O                                                                      | -2.05089 | -1.51019 | 1.89173  |
| O                                                                      | -2.72942 | -1.35119 | -0.55024 |
| H                                                                      | -2.55297 | -2.21966 | 1.39935  |
| H                                                                      | -0.92324 | -2.36543 | -0.35427 |

| <b>TS [4''/6.1]w</b> |                                       |          |          |
|----------------------|---------------------------------------|----------|----------|
| -818.6381640         | ImgFreq/IR inten: -1006.4768/581.8438 |          |          |
| O                    | -1.35245                              | 1.57632  | -0.65636 |
| C                    | -0.37710                              | 2.26192  | 0.03711  |
| O                    | -0.06970                              | 3.35149  | -0.34798 |
| C                    | 0.16608                               | 1.59510  | 1.28193  |
| H                    | -0.49665                              | 1.89725  | 2.10175  |
| H                    | 1.14882                               | 2.01739  | 1.48599  |
| C                    | 0.22069                               | 0.06232  | 1.22472  |
| H                    | 0.32745                               | -0.31266 | 2.24833  |
| C                    | -1.04999                              | -0.48236 | 0.61801  |
| C                    | -1.54687                              | -1.75654 | 0.91249  |
| H                    | -1.01235                              | -2.37765 | 1.62626  |
| C                    | -2.71235                              | -2.23230 | 0.31977  |
| H                    | -3.08141                              | -3.22245 | 0.56412  |
| C                    | -3.40602                              | -1.42419 | -0.58271 |
| H                    | -4.31757                              | -1.78331 | -1.04858 |
| C                    | -2.93674                              | -0.15101 | -0.88460 |
| H                    | -3.45848                              | 0.49851  | -1.57807 |
| C                    | -1.76486                              | 0.30796  | -0.28601 |
| C                    | 1.46845                               | -0.46756 | 0.49673  |
| N                    | 1.53765                               | 0.05668  | -0.88240 |
| O                    | 2.22571                               | -0.62631 | -1.68639 |
| O                    | 2.65138                               | 0.11441  | 0.86665  |
| H                    | 2.97476                               | -1.34641 | -1.16342 |
| H                    | 1.46552                               | -1.57184 | 0.50266  |
| O                    | 3.90433                               | -1.66855 | -0.31508 |
| H                    | 4.80486                               | -1.54244 | -0.63560 |
| H                    | 3.63958                               | -0.91207 | 0.36201  |
| <b>TS [2.2/4]b'</b>  |                                       |          |          |
| -916.6616805         | ImgFreq/IR inten: -894.6979/67.2922   |          |          |
| O                    | -1.39132                              | 1.65929  | 0.22523  |
| C                    | -0.58332                              | 1.33600  | 1.30198  |
| O                    | 0.26157                               | 2.11850  | 1.62393  |
| C                    | -0.89149                              | 0.03203  | 2.00234  |
| H                    | -1.70060                              | 0.23197  | 2.71431  |
| H                    | -0.00539                              | -0.27282 | 2.55367  |
| C                    | -1.34823                              | -1.06949 | 1.04066  |
| H                    | -1.73051                              | -1.92162 | 1.61397  |
| C                    | -2.45500                              | -0.52816 | 0.14841  |
| C                    | -3.50394                              | -1.30897 | -0.34383 |
| H                    | -3.55482                              | -2.35974 | -0.07277 |
| C                    | -4.48104                              | -0.75506 | -1.16500 |
| H                    | -5.29134                              | -1.37221 | -1.53704 |
| C                    | -4.41485                              | 0.59842  | -1.50126 |
| H                    | -5.17341                              | 1.03823  | -2.13989 |

|   |          |          |          |
|---|----------|----------|----------|
| C | -3.38209 | 1.39371  | -1.01675 |
| H | -3.31220 | 2.44748  | -1.26071 |
| C | -2.40823 | 0.82430  | -0.19976 |
| C | -0.27782 | -1.59275 | 0.12976  |
| N | 0.95670  | -1.12822 | 0.13236  |
| O | 1.70625  | -1.48920 | -0.97925 |
| O | 1.31590  | -1.75978 | 1.37704  |
| H | 2.49672  | -0.85581 | -0.95518 |
| H | -0.56711 | -2.29749 | -0.65443 |
| N | 3.81118  | 0.22047  | -0.71349 |
| C | 4.37740  | -0.19610 | 0.57612  |
| C | 4.79005  | 0.08750  | -1.79402 |
| C | 3.28229  | 1.58784  | -0.64123 |
| H | 2.81066  | 1.85052  | -1.59063 |
| H | 4.07609  | 2.32237  | -0.43250 |
| H | 2.53089  | 1.65759  | 0.14590  |
| H | 4.32992  | 0.35948  | -2.74649 |
| H | 5.12983  | -0.94809 | -1.86080 |
| H | 5.66967  | 0.73224  | -1.63792 |
| H | 3.59887  | -0.18525 | 1.34005  |
| H | 5.20434  | 0.45962  | 0.89061  |
| H | 4.75170  | -1.21841 | 0.49771  |

**TS [2.2/4]b''**

-916.6623065

ImgFreq/IR inten: -623.7936/365.4912

|   |          |          |          |
|---|----------|----------|----------|
| O | 3.04867  | -0.12165 | 0.84069  |
| C | 2.85927  | -1.44705 | 0.50974  |
| O | 3.57226  | -2.26553 | 1.01503  |
| C | 1.74981  | -1.73007 | -0.47627 |
| H | 1.49152  | -2.78241 | -0.39193 |
| H | 2.14337  | -1.55795 | -1.48607 |
| C | 0.52870  | -0.81799 | -0.22394 |
| H | 0.15738  | -1.02962 | 0.78474  |
| C | 1.02147  | 0.61393  | -0.28419 |
| C | 0.32992  | 1.68271  | -0.85998 |
| H | -0.64539 | 1.50020  | -1.29446 |
| C | 0.87070  | 2.96793  | -0.88056 |
| H | 0.31562  | 3.78085  | -1.33728 |
| C | 2.12515  | 3.20437  | -0.32071 |
| H | 2.55234  | 4.20157  | -0.33171 |
| C | 2.84135  | 2.15326  | 0.24421  |
| H | 3.82476  | 2.30058  | 0.67601  |
| C | 2.28776  | 0.87731  | 0.24854  |
| C | -0.61126 | -1.11825 | -1.17882 |
| N | -1.16692 | -2.31671 | -1.32756 |
| O | -0.90302 | -3.12603 | -0.21193 |
| O | -2.09936 | -0.60157 | -0.46276 |



|                                                                         |          |          |          |
|-------------------------------------------------------------------------|----------|----------|----------|
| H                                                                       | -1.46457 | -3.89596 | -0.35935 |
| H                                                                       | -0.60052 | -0.58036 | -2.12286 |
| N                                                                       | -3.10331 | 0.55232  | 0.54768  |
| C                                                                       | -3.53325 | 1.65652  | -0.30560 |
| C                                                                       | -4.19966 | -0.34201 | 0.91284  |
| C                                                                       | -2.30456 | 0.97107  | 1.69661  |
| H                                                                       | -3.79019 | -1.20840 | 1.42905  |
| H                                                                       | -4.69667 | -0.68256 | 0.00649  |
| H                                                                       | -4.92422 | 0.16902  | 1.56295  |
| H                                                                       | -2.67232 | 2.26555  | -0.57624 |
| H                                                                       | -4.26740 | 2.29259  | 0.20937  |
| H                                                                       | -3.97868 | 1.24970  | -1.21215 |
| H                                                                       | -1.94442 | 0.08456  | 2.21703  |
| H                                                                       | -2.90052 | 1.57949  | 2.39126  |
| H                                                                       | -1.44933 | 1.55180  | 1.35488  |
| <b>TS [4b/4:bH<sup>+</sup>]</b>                                         |          |          |          |
| -916.7322648                      ImgFreq/IR inten: -860.8006/6016.3728 |          |          |          |
| O                                                                       | 1.18397  | -1.31140 | 1.06682  |
| C                                                                       | 0.48519  | -0.46830 | 1.90035  |
| O                                                                       | -0.38370 | -0.94334 | 2.57896  |
| C                                                                       | 0.92689  | 0.97629  | 1.91939  |
| H                                                                       | 1.76840  | 1.04148  | 2.61989  |
| H                                                                       | 0.10841  | 1.57028  | 2.32217  |
| C                                                                       | 1.36394  | 1.49871  | 0.54272  |
| H                                                                       | 1.86747  | 2.46192  | 0.68166  |
| C                                                                       | 2.31601  | 0.51387  | -0.08774 |
| C                                                                       | 3.32760  | 0.88299  | -0.97867 |
| H                                                                       | 3.45423  | 1.93407  | -1.22262 |
| C                                                                       | 4.17105  | -0.06726 | -1.54867 |
| H                                                                       | 4.94994  | 0.24188  | -2.23750 |
| C                                                                       | 4.01350  | -1.41482 | -1.22394 |
| H                                                                       | 4.66856  | -2.16256 | -1.65861 |
| C                                                                       | 3.01691  | -1.80651 | -0.33541 |
| H                                                                       | 2.87400  | -2.84625 | -0.06343 |
| C                                                                       | 2.17926  | -0.84229 | 0.21775  |
| C                                                                       | 0.15395  | 1.79229  | -0.36791 |
| N                                                                       | -0.86590 | 0.77344  | -0.33508 |
| O                                                                       | -1.48392 | 0.61103  | -1.46171 |
| O                                                                       | -0.87687 | 2.49441  | 0.19068  |
| H                                                                       | -2.50880 | 0.03355  | -1.10169 |
| H                                                                       | 0.45349  | 2.09137  | -1.38114 |
| N                                                                       | -3.54199 | -0.51826 | -0.59118 |
| C                                                                       | -3.09648 | -1.72614 | 0.14128  |
| C                                                                       | -4.14013 | 0.47872  | 0.32619  |
| C                                                                       | -4.45959 | -0.85845 | -1.69557 |
| H                                                                       | -4.71686 | 0.04746  | -2.24546 |

|                                                                         |          |          |          |
|-------------------------------------------------------------------------|----------|----------|----------|
| H                                                                       | -5.37709 | -1.32072 | -1.31610 |
| H                                                                       | -3.96593 | -1.55284 | -2.37636 |
| H                                                                       | -4.38601 | 1.38013  | -0.23529 |
| H                                                                       | -3.41229 | 0.73873  | 1.09224  |
| H                                                                       | -5.04718 | 0.07921  | 0.79227  |
| H                                                                       | -2.59300 | -2.40031 | -0.55248 |
| H                                                                       | -3.95287 | -2.24348 | 0.58735  |
| H                                                                       | -2.39374 | -1.44051 | 0.92242  |
| <b>TS [4:bH<sup>+</sup>/6.1]b</b>                                       |          |          |          |
| -916.7603690                      ImgFreq/IR inten: -820.5050/5432.8938 |          |          |          |
| O                                                                       | 1.18397  | -1.31140 | 1.06682  |
| C                                                                       | 0.48519  | -0.46830 | 1.90035  |
| O                                                                       | -0.38370 | -0.94334 | 2.57896  |
| C                                                                       | 0.92689  | 0.97629  | 1.91939  |
| H                                                                       | 1.76840  | 1.04148  | 2.61989  |
| H                                                                       | 0.10841  | 1.57028  | 2.32217  |
| C                                                                       | 1.36394  | 1.49871  | 0.54272  |
| H                                                                       | 1.86747  | 2.46192  | 0.68166  |
| C                                                                       | 2.31601  | 0.51387  | -0.08774 |
| C                                                                       | 3.32760  | 0.88299  | -0.97867 |
| H                                                                       | 3.45423  | 1.93407  | -1.22262 |
| C                                                                       | 4.17105  | -0.06726 | -1.54867 |
| H                                                                       | 4.94994  | 0.24188  | -2.23750 |
| C                                                                       | 4.01350  | -1.41482 | -1.22394 |
| H                                                                       | 4.66856  | -2.16256 | -1.65861 |
| C                                                                       | 3.01691  | -1.80651 | -0.33541 |
| H                                                                       | 2.87400  | -2.84625 | -0.06343 |
| C                                                                       | 2.17926  | -0.84229 | 0.21775  |
| C                                                                       | 0.15395  | 1.79229  | -0.36791 |
| N                                                                       | -0.86590 | 0.77344  | -0.33508 |
| O                                                                       | -1.48392 | 0.61103  | -1.46171 |
| O                                                                       | -0.87687 | 2.49441  | 0.19068  |
| H                                                                       | -2.50880 | 0.03355  | -1.10169 |
| H                                                                       | 0.45349  | 2.09137  | -1.38114 |
| N                                                                       | -3.54199 | -0.51826 | -0.59118 |
| C                                                                       | -3.09648 | -1.72614 | 0.14128  |
| C                                                                       | -4.14013 | 0.47872  | 0.32619  |
| C                                                                       | -4.45959 | -0.85845 | -1.69557 |
| H                                                                       | -4.71686 | 0.04746  | -2.24546 |
| H                                                                       | -5.37709 | -1.32072 | -1.31610 |
| H                                                                       | -3.96593 | -1.55284 | -2.37636 |
| H                                                                       | -4.38601 | 1.38013  | -0.23529 |
| H                                                                       | -3.41229 | 0.73873  | 1.09224  |
| H                                                                       | -5.04718 | 0.07921  | 0.79227  |
| H                                                                       | -2.59300 | -2.40031 | -0.55248 |
| H                                                                       | -3.95287 | -2.24348 | 0.58735  |

|                                                 |                                           |          |          |
|-------------------------------------------------|-------------------------------------------|----------|----------|
| H                                               | -2.39374                                  | -1.44051 | 0.92242  |
| <b>TS [4:bH<sup>+</sup>/6.2]:bH<sup>+</sup></b> |                                           |          |          |
| -916.6279092                                    | ImgFreq/IR inten:<br>-1485.9711/2006.5186 |          |          |
| O                                               | -2.06978                                  | 1.48418  | -0.89267 |
| C                                               | -1.23231                                  | 2.16121  | -0.03979 |
| O                                               | -0.70629                                  | 3.16397  | -0.43594 |
| C                                               | -1.11213                                  | 1.60333  | 1.35923  |
| H                                               | -1.97168                                  | 1.99022  | 1.92203  |
| H                                               | -0.21063                                  | 2.02012  | 1.80398  |
| C                                               | -1.11754                                  | 0.06377  | 1.42054  |
| H                                               | -1.28352                                  | -0.23042 | 2.46290  |
| C                                               | -2.26313                                  | -0.45205 | 0.58093  |
| C                                               | -2.91958                                  | -1.65727 | 0.84237  |
| H                                               | -2.59673                                  | -2.25157 | 1.69187  |
| C                                               | -3.96236                                  | -2.10272 | 0.03465  |
| H                                               | -4.45815                                  | -3.04199 | 0.25659  |
| C                                               | -4.36593                                  | -1.33545 | -1.05885 |
| H                                               | -5.17916                                  | -1.67198 | -1.69370 |
| C                                               | -3.72652                                  | -0.13256 | -1.33981 |
| H                                               | -4.01647                                  | 0.48262  | -2.18420 |
| C                                               | -2.68204                                  | 0.29329  | -0.52274 |
| C                                               | 0.18024                                   | -0.62093 | 0.99140  |
| N                                               | 0.88129                                   | -0.06545 | -0.14484 |
| O                                               | 1.54764                                   | -1.27662 | -0.56881 |
| O                                               | 1.38821                                   | 0.17782  | 1.25110  |
| H                                               | 3.00039                                   | -0.84830 | -0.45486 |
| H                                               | 0.93403                                   | -1.77729 | 0.29112  |
| N                                               | 4.00473                                   | -0.42730 | -0.36907 |
| C                                               | 3.87091                                   | 1.04087  | -0.59720 |
| C                                               | 4.48007                                   | -0.72618 | 1.00928  |
| C                                               | 4.84054                                   | -1.07735 | -1.40995 |
| H                                               | 4.85349                                   | -2.15279 | -1.23694 |
| H                                               | 5.85839                                   | -0.68554 | -1.37204 |
| H                                               | 4.40447                                   | -0.87914 | -2.38789 |
| H                                               | 4.53574                                   | -1.80675 | 1.13692  |
| H                                               | 3.75274                                   | -0.32050 | 1.70897  |
| H                                               | 5.46553                                   | -0.28348 | 1.16547  |
| H                                               | 3.44333                                   | 1.20591  | -1.58449 |
| H                                               | 4.85345                                   | 1.51157  | -0.52834 |
| H                                               | 3.19319                                   | 1.44592  | 0.15012  |
| <b>TS [6.1/6.2]</b>                             |                                           |          |          |
| -742.1181135                                    | ImgFreq/IR inten: -2359.5993/442.3123     |          |          |
| O                                               | 0.42755                                   | 1.76403  | 0.60656  |
| C                                               | -0.77569                                  | 2.01984  | -0.00956 |
| O                                               | -1.45177                                  | 2.91531  | 0.40569  |

|                                                                         |          |          |          |
|-------------------------------------------------------------------------|----------|----------|----------|
| C                                                                       | -1.10618 | 1.16702  | -1.21536 |
| H                                                                       | -0.60007 | 1.62863  | -2.07209 |
| H                                                                       | -2.17804 | 1.23782  | -1.39116 |
| C                                                                       | -0.64165 | -0.29912 | -1.09019 |
| H                                                                       | -0.68648 | -0.74526 | -2.08917 |
| C                                                                       | 0.78676  | -0.32640 | -0.59663 |
| C                                                                       | 1.68196  | -1.35222 | -0.91545 |
| H                                                                       | 1.34213  | -2.16759 | -1.54767 |
| C                                                                       | 2.98797  | -1.34213 | -0.43818 |
| H                                                                       | 3.66759  | -2.14678 | -0.69691 |
| C                                                                       | 3.41908  | -0.28950 | 0.37254  |
| H                                                                       | 4.43608  | -0.27239 | 0.74970  |
| C                                                                       | 2.54907  | 0.74359  | 0.69840  |
| H                                                                       | 2.85746  | 1.57206  | 1.32557  |
| C                                                                       | 1.24276  | 0.71587  | 0.21341  |
| C                                                                       | -1.55008 | -1.15656 | -0.21619 |
| O                                                                       | -2.92581 | -0.97337 | -0.54957 |
| N                                                                       | -1.38468 | -0.99295 | 1.18149  |
| O                                                                       | -1.75613 | -2.09627 | 1.67493  |
| H                                                                       | -3.28654 | -1.77623 | -0.93747 |
| H                                                                       | -1.77404 | -2.53961 | 0.47121  |
| <b>TS [6.2/6.3]</b>                                                     |          |          |          |
| -742.2090475                      ImgFreq/IR inten: -1884.4039/398.1168 |          |          |          |
| O                                                                       | -0.12819 | -1.83583 | 0.25735  |
| C                                                                       | 1.05676  | -1.79696 | -0.43943 |
| O                                                                       | 1.81981  | -2.70914 | -0.32106 |
| C                                                                       | 1.25744  | -0.63030 | -1.38393 |
| H                                                                       | 0.86249  | -0.95891 | -2.35248 |
| H                                                                       | 2.33145  | -0.49941 | -1.51264 |
| C                                                                       | 0.54203  | 0.68189  | -1.00741 |
| H                                                                       | 0.44453  | 1.28860  | -1.91017 |
| C                                                                       | -0.84493 | 0.38349  | -0.46810 |
| C                                                                       | -1.88549 | 1.31441  | -0.53609 |
| H                                                                       | -1.69463 | 2.28342  | -0.98678 |
| C                                                                       | -3.14571 | 1.01614  | -0.02870 |
| H                                                                       | -3.94169 | 1.75011  | -0.08861 |
| C                                                                       | -3.37914 | -0.23100 | 0.55333  |
| H                                                                       | -4.35974 | -0.47426 | 0.94830  |
| C                                                                       | -2.35802 | -1.17145 | 0.62617  |
| H                                                                       | -2.51389 | -2.14879 | 1.06833  |
| C                                                                       | -1.09904 | -0.85574 | 0.11969  |
| C                                                                       | 1.29765  | 1.55358  | -0.03733 |
| O                                                                       | 1.40832  | 2.83195  | -0.17108 |
| N                                                                       | 1.92257  | 1.26709  | 1.07929  |
| O                                                                       | 2.24011  | -0.05191 | 1.43425  |
| H                                                                       | 2.12097  | 2.58602  | 0.95222  |

|                      |                                       |          |          |
|----------------------|---------------------------------------|----------|----------|
| H                    | 1.92282                               | -0.16138 | 2.34187  |
| <b>TS [6.1/6.2]w</b> |                                       |          |          |
| -818.6277658         | ImgFreq/IR inten: -1607.8191/738.1699 |          |          |
| O                    | -0.17672                              | -1.92095 | 0.65956  |
| C                    | 1.00489                               | -2.10932 | -0.01706 |
| O                    | 1.77664                               | -2.93073 | 0.38556  |
| C                    | 1.19975                               | -1.25564 | -1.25135 |
| H                    | 0.63631                               | -1.72099 | -2.06874 |
| H                    | 2.25402                               | -1.27360 | -1.51368 |
| C                    | 0.67100                               | 0.18514  | -1.05687 |
| H                    | 0.70638                               | 0.68574  | -2.02832 |
| C                    | -0.76489                              | 0.07350  | -0.60191 |
| C                    | -1.78192                              | 0.92900  | -1.03225 |
| H                    | -1.53290                              | 1.75804  | -1.68687 |
| C                    | -3.09855                              | 0.74325  | -0.62041 |
| H                    | -3.87316                              | 1.42251  | -0.95972 |
| C                    | -3.41726                              | -0.32270 | 0.22193  |
| H                    | -4.44058                              | -0.47390 | 0.54874  |
| C                    | -2.42632                              | -1.20719 | 0.63429  |
| H                    | -2.64703                              | -2.05172 | 1.27676  |
| C                    | -1.11675                              | -1.00596 | 0.21205  |
| C                    | 1.65049                               | 0.95176  | -0.12461 |
| O                    | 2.93870                               | 0.85745  | -0.64084 |
| N                    | 1.60611                               | 1.05087  | 1.21370  |
| O                    | 0.46352                               | 1.28364  | 1.77341  |
| H                    | 3.55795                               | 1.00147  | 0.09110  |
| H                    | 1.03227                               | 2.32781  | -0.18048 |
| H                    | -0.08834                              | 2.40681  | 0.92537  |
| O                    | 0.13864                               | 3.05983  | 0.12535  |
| H                    | 0.50355                               | 3.87696  | 0.49282  |
| <b>TS [6.2/6.3]w</b> |                                       |          |          |
| -818.7069622         | ImgFreq/IR inten: -1711.7737/149.2402 |          |          |
| O                    | -1.55031                              | 1.58862  | -0.32618 |
| C                    | -0.51589                              | 2.25439  | 0.28275  |
| O                    | -0.34387                              | 3.40888  | 0.02013  |
| C                    | 0.25164                               | 1.49666  | 1.34413  |
| H                    | -0.30897                              | 1.64930  | 2.27439  |
| H                    | 1.21065                               | 1.99747  | 1.47452  |
| C                    | 0.40406                               | -0.02295 | 1.12946  |
| H                    | 0.54826                               | -0.48052 | 2.11007  |
| C                    | -0.85634                              | -0.59849 | 0.51629  |
| C                    | -1.16147                              | -1.96026 | 0.61622  |
| H                    | -0.46608                              | -2.61585 | 1.13214  |
| C                    | -2.32992                              | -2.47907 | 0.06933  |
| H                    | -2.54662                              | -3.53804 | 0.15732  |
| C                    | -3.22241                              | -1.62796 | -0.58512 |

|                                                                       |          |          |          |
|-----------------------------------------------------------------------|----------|----------|----------|
| H                                                                     | -4.14011 | -2.02014 | -1.01051 |
| C                                                                     | -2.94129 | -0.27120 | -0.69173 |
| H                                                                     | -3.61711 | 0.41245  | -1.19287 |
| C                                                                     | -1.76157 | 0.23248  | -0.14499 |
| C                                                                     | 1.66267  | -0.43662 | 0.37246  |
| O                                                                     | 2.50533  | -1.18167 | 1.00490  |
| N                                                                     | 1.94228  | -0.09643 | -0.86479 |
| O                                                                     | 1.08016  | 0.84969  | -1.44761 |
| H                                                                     | 3.47864  | -1.33604 | 0.22825  |
| H                                                                     | 0.78689  | 0.45506  | -2.28042 |
| H                                                                     | 3.16646  | -0.51171 | -1.16774 |
| O                                                                     | 4.08394  | -1.18486 | -0.80379 |
| H                                                                     | 4.91311  | -0.70410 | -0.70410 |
| <b>TS [6.2/7]<sup>+</sup>w</b>                                        |          |          |          |
| -819.0805505                      ImgFreq/IR inten: -164.8451/83.6549 |          |          |          |
| O                                                                     | -0.54915 | -1.09261 | 0.13240  |
| C                                                                     | -1.24055 | -0.12272 | 0.77942  |
| O                                                                     | -2.48773 | -0.42659 | 1.00717  |
| C                                                                     | -0.47822 | 0.64732  | 1.83680  |
| H                                                                     | -0.09265 | -0.04521 | 2.58759  |
| H                                                                     | -1.14299 | 1.36581  | 2.31375  |
| C                                                                     | 0.65632  | 1.30580  | 1.03219  |
| H                                                                     | 1.23802  | 2.04202  | 1.58430  |
| C                                                                     | 1.51139  | 0.18696  | 0.45112  |
| C                                                                     | 2.89674  | 0.25362  | 0.30298  |
| H                                                                     | 3.42661  | 1.14291  | 0.62819  |
| C                                                                     | 3.59618  | -0.81662 | -0.24855 |
| H                                                                     | 4.67369  | -0.76099 | -0.35004 |
| C                                                                     | 2.91208  | -1.95868 | -0.66600 |
| H                                                                     | 3.45651  | -2.79180 | -1.09544 |
| C                                                                     | 1.52806  | -2.04165 | -0.53388 |
| H                                                                     | 0.97993  | -2.92094 | -0.85134 |
| C                                                                     | 0.84932  | -0.96883 | 0.02257  |
| C                                                                     | -0.05796 | 1.90068  | -0.15266 |
| O                                                                     | 0.49542  | 2.80552  | -0.91622 |
| N                                                                     | -1.19049 | 1.30788  | -0.35300 |
| O                                                                     | -1.76824 | 1.49263  | -1.59681 |
| H                                                                     | -0.04448 | 2.98320  | -1.70746 |
| H                                                                     | -2.72628 | 1.53329  | -1.44991 |
| O                                                                     | -3.66463 | -2.21265 | -0.52750 |
| H                                                                     | -2.84883 | -1.14925 | 0.41683  |
| H                                                                     | -3.25017 | -2.94789 | -0.99255 |
| H                                                                     | -4.58148 | -2.45189 | -0.34904 |

**TS [7/8]<sup>+</sup>w**  
-819.0097791

ImgFreq/IR inten:  
-1840.9797/1056.4662

|   |          |          |          |
|---|----------|----------|----------|
| O | -0.52154 | 1.39577  | -0.71800 |
| C | 0.65838  | 1.67540  | 0.34352  |
| O | 0.95958  | 2.81888  | -0.14980 |
| C | 0.09893  | 1.29243  | 1.69782  |
| H | -0.83302 | 1.80879  | 1.91870  |
| H | 0.83403  | 1.51569  | 2.47333  |
| C | -0.07923 | -0.22991 | 1.46393  |
| H | -0.13298 | -0.83102 | 2.37007  |
| C | -1.30317 | -0.44144 | 0.57109  |
| C | -2.24073 | -1.45062 | 0.78941  |
| H | -2.08869 | -2.15675 | 1.59918  |
| C | -3.37769 | -1.54176 | -0.01169 |
| H | -4.10456 | -2.32357 | 0.17463  |
| C | -3.58543 | -0.62694 | -1.04275 |
| H | -4.47252 | -0.69772 | -1.66160 |
| C | -2.65686 | 0.38362  | -1.29437 |
| H | -2.79600 | 1.09188  | -2.10289 |
| C | -1.53877 | 0.45311  | -0.48394 |
| C | 1.17662  | -0.56177 | 0.66673  |
| O | 1.64525  | -1.74037 | 0.54088  |
| N | 1.61161  | 0.54699  | 0.11159  |
| O | 2.54083  | 0.59816  | -0.89119 |
| H | 2.45033  | -1.87402 | -0.07498 |
| H | 2.69841  | 1.55530  | -1.02112 |
| H | -0.18799 | 2.53398  | -0.87487 |
| O | 3.66270  | -2.24535 | -0.93414 |
| H | 4.07266  | -1.66461 | -1.58366 |
| H | 4.07208  | -3.11634 | -0.97852 |

**TS [7/8]<sup>+</sup>2w**

-819.0457766

ImgFreq/IR inten: -392.6944/79.8358

|   |          |          |          |
|---|----------|----------|----------|
| O | 0.36530  | 1.16578  | -0.10171 |
| C | 1.56486  | 0.18478  | 0.59102  |
| O | 2.63578  | 0.81430  | 0.57014  |
| C | 0.82979  | -0.43639 | 1.77256  |
| H | 0.38480  | 0.31984  | 2.41605  |
| H | 1.53924  | -1.03252 | 2.35050  |
| C | -0.22730 | -1.31856 | 1.06351  |
| H | -0.61779 | -2.13372 | 1.67122  |
| C | -1.32993 | -0.44444 | 0.48424  |
| C | -2.67339 | -0.82390 | 0.47852  |
| H | -2.96074 | -1.77592 | 0.91352  |
| C | -3.64112 | 0.01334  | -0.06676 |
| H | -4.68327 | -0.28314 | -0.05600 |

|                                                                         |          |          |          |
|-------------------------------------------------------------------------|----------|----------|----------|
| C                                                                       | -3.26291 | 1.23432  | -0.62582 |
| H                                                                       | -4.01185 | 1.88910  | -1.05707 |
| C                                                                       | -1.92664 | 1.62462  | -0.64112 |
| H                                                                       | -1.63084 | 2.56685  | -1.09045 |
| C                                                                       | -0.96386 | 0.78695  | -0.08353 |
| C                                                                       | 0.55259  | -1.83613 | -0.12316 |
| O                                                                       | 0.22547  | -2.89280 | -0.80726 |
| N                                                                       | 1.51991  | -1.01459 | -0.38205 |
| O                                                                       | 2.26922  | -1.07937 | -1.51738 |
| H                                                                       | 0.77776  | -3.02099 | -1.59910 |
| H                                                                       | 3.09376  | -0.60279 | -1.29803 |
| H                                                                       | 2.50841  | 2.40621  | 0.12971  |
| H                                                                       | 0.97212  | 2.41909  | -0.25917 |
| O                                                                       | 1.84158  | 3.06489  | -0.24887 |
| H                                                                       | 1.75771  | 3.86004  | 0.29705  |
| <b>TS [8<sup>+</sup>2w/8:H<sub>3</sub>O<sup>+</sup>]</b>                |          |          |          |
| -819.0948271                      ImgFreq/IR inten: -565.7872/3670.1894 |          |          |          |
| O                                                                       | -0.58889 | -0.26831 | 1.67487  |
| C                                                                       | 1.74675  | -1.76937 | -0.06437 |
| O                                                                       | 2.57743  | -2.50008 | 0.39216  |
| C                                                                       | 0.37404  | -1.97313 | -0.64597 |
| H                                                                       | -0.25903 | -2.44515 | 0.10617  |
| H                                                                       | 0.43487  | -2.65413 | -1.49722 |
| C                                                                       | -0.13575 | -0.55352 | -1.04088 |
| H                                                                       | -0.16889 | -0.46308 | -2.13145 |
| C                                                                       | -1.49526 | -0.16365 | -0.49862 |
| C                                                                       | -2.57603 | 0.06144  | -1.35249 |
| H                                                                       | -2.43303 | -0.01821 | -2.42587 |
| C                                                                       | -3.83302 | 0.38226  | -0.84624 |
| H                                                                       | -4.66327 | 0.55052  | -1.52184 |
| C                                                                       | -4.01342 | 0.48437  | 0.53098  |
| H                                                                       | -4.98776 | 0.73255  | 0.93673  |
| C                                                                       | -2.94541 | 0.27031  | 1.39999  |
| H                                                                       | -3.08738 | 0.35302  | 2.47408  |
| C                                                                       | -1.69463 | -0.05023 | 0.88299  |
| C                                                                       | 0.97830  | 0.37561  | -0.59009 |
| O                                                                       | 0.96132  | 1.62113  | -0.67983 |
| N                                                                       | 1.98944  | -0.36407 | -0.12788 |
| O                                                                       | 3.15433  | 0.17124  | 0.36554  |
| H                                                                       | 1.94193  | 2.34136  | -0.25947 |
| H                                                                       | 3.65266  | -0.60919 | 0.68697  |
| H                                                                       | -0.81049 | -0.18153 | 2.61029  |
| O                                                                       | 2.82185  | 2.99373  | 0.14086  |
| H                                                                       | 3.65066  | 2.52692  | 0.30803  |
| H                                                                       | 2.96195  | 3.88924  | -0.19189 |



*Ethyl ester of 3-coumarin-carboxylic acid*

**TS [2.1/2.2]**

-1009.3959879

ImgFreq/IR inten: -2165.4786/564.3904

|   |          |          |          |
|---|----------|----------|----------|
| O | -0.42107 | 0.59259  | 1.76819  |
| C | -0.15167 | -0.72609 | 1.50586  |
| O | -0.18152 | -1.51689 | 2.40225  |
| C | 0.18679  | -1.06641 | 0.06061  |
| H | 0.68866  | -2.03723 | 0.08643  |
| C | -1.05275 | -1.26946 | -0.82409 |
| C | 1.11172  | 0.00610  | -0.56112 |
| H | 1.19314  | -0.21324 | -1.63147 |
| C | 0.45371  | 1.35424  | -0.36938 |
| C | 0.55575  | 2.39653  | -1.29308 |
| H | 1.12367  | 2.23938  | -2.20539 |
| C | -0.06778 | 3.61979  | -1.06222 |
| H | 0.01930  | 4.41859  | -1.79051 |
| C | -0.81033 | 3.80958  | 0.10423  |
| H | -1.30043 | 4.75932  | 0.29018  |
| C | -0.93173 | 2.78143  | 1.03337  |
| H | -1.50358 | 2.90221  | 1.94621  |
| C | -0.29774 | 1.56726  | 0.78713  |
| C | 2.48885  | 0.00142  | 0.07696  |
| O | 3.32780  | -1.87752 | -1.15614 |
| N | 3.35353  | -1.08627 | -0.25725 |
| O | 4.21098  | -1.16000 | 0.74978  |
| H | 3.05898  | 0.92106  | -0.06310 |
| H | 3.37219  | -0.36356 | 1.23960  |
| O | -0.98673 | -1.39563 | -2.02068 |
| O | -2.18164 | -1.31384 | -0.11122 |
| C | -3.41651 | -1.54908 | -0.84518 |
| C | -4.54999 | -1.54834 | 0.15652  |
| H | -3.32322 | -2.50293 | -1.36792 |
| H | -3.52159 | -0.76276 | -1.59515 |
| H | -4.41663 | -2.33194 | 0.90521  |
| H | -5.49616 | -1.72808 | -0.36108 |
| H | -4.62159 | -0.58845 | 0.67244  |

**TS [2.1/2.2]w**

-1085.8869486

ImgFreq/IR inten: -1383.0074/101.7790

|   |          |          |          |
|---|----------|----------|----------|
| O | -0.42203 | 0.58579  | 1.70505  |
| C | -0.23935 | -0.73614 | 1.36795  |
| O | -0.17390 | -1.54862 | 2.24295  |
| C | -0.09689 | -1.03163 | -0.11674 |
| H | 0.37003  | -2.01608 | -0.19412 |
| C | -1.44409 | -1.15364 | -0.84257 |
| C | 0.79053  | 0.03159  | -0.80485 |
| H | 0.74433  | -0.16170 | -1.88107 |

|   |          |          |          |
|---|----------|----------|----------|
| C | 0.19344  | 1.38862  | -0.50412 |
| C | 0.20452  | 2.45348  | -1.40686 |
| H | 0.65211  | 2.30921  | -2.38565 |
| C | -0.35879 | 3.68214  | -1.07074 |
| H | -0.34450 | 4.49817  | -1.78500 |
| C | -0.95014 | 3.85501  | 0.18148  |
| H | -1.39467 | 4.80804  | 0.44795  |
| C | -0.97946 | 2.80446  | 1.09375  |
| H | -1.43472 | 2.91098  | 2.07180  |
| C | -0.40702 | 1.58635  | 0.74029  |
| C | 2.23181  | -0.01107 | -0.32654 |
| O | 2.56637  | -1.99594 | -1.44658 |
| N | 3.01750  | -1.06761 | -0.79276 |
| O | 4.26854  | -1.08684 | -0.41006 |
| H | 2.78517  | 0.92174  | -0.40496 |
| H | 2.75985  | -0.17251 | 1.22208  |
| O | -1.55177 | -1.13969 | -2.04221 |
| O | -2.46228 | -1.30882 | 0.01223  |
| C | -3.78355 | -1.49508 | -0.56648 |
| C | -4.76244 | -1.66286 | 0.57484  |
| H | -3.74946 | -2.37109 | -1.21710 |
| H | -4.01080 | -0.62514 | -1.18588 |
| H | -5.76961 | -1.81028 | 0.17552  |
| H | -4.77696 | -0.77963 | 1.21713  |
| H | -4.50850 | -2.52958 | 1.18858  |
| H | 4.19916  | -0.73043 | 0.92429  |
| O | 3.64422  | -0.43116 | 1.83634  |
| H | 4.01142  | 0.35637  | 2.25743  |

**TS [2.2+2w/3.1+]**

-1086.2166867

ImgFreq/IR inten:

-1423.7935/1170.4711

|   |          |          |          |
|---|----------|----------|----------|
| O | -1.02935 | -1.47900 | 1.70118  |
| C | 0.21885  | -0.95961 | 1.81259  |
| O | 0.90205  | -1.24335 | 2.74835  |
| C | 0.70014  | 0.04697  | 0.76247  |
| C | 1.94231  | -0.39556 | -0.01995 |
| H | 1.09104  | 0.85976  | 1.38479  |
| C | -0.36576 | 0.61524  | -0.23255 |
| H | 0.07365  | 0.69310  | -1.22961 |
| C | -1.60530 | -0.24874 | -0.32985 |
| C | -2.49642 | -0.11929 | -1.40615 |
| H | -2.28795 | 0.60590  | -2.18642 |
| C | -3.62453 | -0.92500 | -1.50121 |
| H | -4.29902 | -0.81416 | -2.34235 |
| C | -3.87062 | -1.89069 | -0.52266 |
| H | -4.74498 | -2.52765 | -0.59257 |

|   |          |          |          |
|---|----------|----------|----------|
| C | -2.98516 | -2.05524 | 0.53455  |
| H | -3.13941 | -2.81087 | 1.29575  |
| C | -1.86137 | -1.23765 | 0.61817  |
| C | -0.66486 | 2.03199  | 0.21703  |
| N | 0.39426  | 3.08719  | -0.03732 |
| O | 1.30890  | 2.81340  | -1.02466 |
| O | 1.00880  | 3.38051  | 1.19393  |
| H | -0.98753 | 2.13078  | 1.25158  |
| H | 1.86542  | 2.01421  | -0.78551 |
| O | -1.62608 | 2.76447  | -0.66048 |
| H | -2.52392 | 2.88809  | -0.30867 |
| H | -0.82157 | 3.61732  | -0.61217 |
| H | 1.47856  | 4.22095  | 1.05697  |
| O | 2.56443  | 0.43805  | -0.66264 |
| O | 2.22417  | -1.66438 | 0.07067  |
| C | 3.43700  | -2.18262 | -0.59839 |
| H | 3.74320  | -2.99760 | 0.05396  |
| H | 4.18761  | -1.39446 | -0.58117 |
| C | 3.11447  | -2.65235 | -2.00030 |
| H | 4.00909  | -3.10345 | -2.43736 |
| H | 2.81210  | -1.82467 | -2.64487 |
| H | 2.32806  | -3.40965 | -1.99442 |

**TS [2.2<sup>+</sup>w/3.2<sup>+</sup>]**

-1086.2448778

ImgFreq/IR inten: -820.6690/2136.9112

|   |          |          |          |
|---|----------|----------|----------|
| O | -0.42009 | 0.16650  | 1.78406  |
| C | 0.29870  | -0.78281 | 1.26769  |
| O | 1.22023  | -1.29170 | 1.96435  |
| C | 0.23783  | -1.02623 | -0.20531 |
| C | -1.14990 | -1.37231 | -0.78435 |
| H | 0.87581  | -1.87135 | -0.45885 |
| C | 0.80635  | 0.29667  | -0.76530 |
| H | 0.87067  | 0.22345  | -1.85134 |
| C | -0.18939 | 1.36460  | -0.33448 |
| C | -0.55722 | 2.45995  | -1.11339 |
| H | -0.08661 | 2.60701  | -2.07967 |
| C | -1.54213 | 3.34529  | -0.67210 |
| H | -1.81845 | 4.18982  | -1.29266 |
| C | -2.18166 | 3.14134  | 0.54897  |
| H | -2.94966 | 3.82837  | 0.88455  |
| C | -1.83747 | 2.05283  | 1.35122  |
| H | -2.30558 | 1.87764  | 2.31252  |
| C | -0.85714 | 1.19843  | 0.88760  |
| C | 2.23713  | 0.57909  | -0.20331 |
| N | 2.94768  | -0.70762 | 0.19969  |
| O | 4.20356  | -0.40195 | 0.70880  |
| O | 3.09161  | -1.48013 | -0.98094 |

|   |          |          |          |
|---|----------|----------|----------|
| H | 2.17772  | 1.11030  | 0.75055  |
| H | 4.66897  | 0.08910  | 0.00179  |
| O | 3.02739  | 1.27073  | -1.11542 |
| H | 3.25521  | 2.14954  | -0.78879 |
| H | 2.11500  | -1.30005 | 1.26417  |
| H | 3.53137  | -2.29950 | -0.69783 |
| O | -1.43624 | -1.15388 | -1.92789 |
| O | -1.88127 | -2.00299 | 0.12858  |
| C | -3.19588 | -2.53146 | -0.28308 |
| H | -3.34545 | -3.37303 | 0.39062  |
| H | -3.10117 | -2.89457 | -1.30557 |
| C | -4.27913 | -1.48325 | -0.14230 |
| H | -5.24406 | -1.93431 | -0.38819 |
| H | -4.12075 | -0.64615 | -0.82433 |
| H | -4.33891 | -1.10828 | 0.88170  |

**TS [3.1+/3.2+]**

-1086.2410391

ImgFreq/IR inten:

-1144.7969/2716.0642

|   |          |          |          |
|---|----------|----------|----------|
| O | -0.75858 | 0.20111  | 1.85642  |
| C | -0.13567 | -0.88543 | 1.48553  |
| O | 0.54777  | -1.51476 | 2.31787  |
| C | -0.00186 | -1.17710 | 0.01752  |
| C | -1.31743 | -1.30236 | -0.77931 |
| H | 0.50326  | -2.13655 | -0.10214 |
| C | 0.86583  | -0.00483 | -0.48378 |
| H | 0.99958  | -0.12225 | -1.55883 |
| C | 0.06858  | 1.25801  | -0.18529 |
| C | 0.07398  | 2.38302  | -1.00904 |
| H | 0.72153  | 2.40149  | -1.87927 |
| C | -0.75993 | 3.46665  | -0.73522 |
| H | -0.74414 | 4.33256  | -1.38674 |
| C | -1.62186 | 3.43395  | 0.35964  |
| H | -2.27405 | 4.27458  | 0.56605  |
| C | -1.65101 | 2.32187  | 1.20043  |
| H | -2.29821 | 2.27617  | 2.06818  |
| C | -0.80835 | 1.26642  | 0.90762  |
| C | 2.27032  | -0.01313 | 0.18969  |
| N | 3.32132  | 0.19854  | -0.75012 |
| O | 3.31078  | -0.72795 | -1.79633 |
| O | 4.52494  | 0.06146  | -0.01394 |
| H | 2.37477  | 0.73925  | 0.96842  |
| H | 3.53697  | -1.60510 | -1.43245 |
| H | 5.15648  | 0.66931  | -0.42699 |
| O | 2.50974  | -1.36178 | 0.90911  |
| H | 3.38726  | -1.32814 | 1.32795  |
| H | 1.62903  | -1.63744 | 1.68815  |

|   |          |          |          |
|---|----------|----------|----------|
| O | -1.37527 | -1.07759 | -1.95633 |
| O | -2.28336 | -1.76342 | 0.00594  |
| C | -3.59102 | -2.06162 | -0.60815 |
| H | -3.99125 | -2.84618 | 0.03117  |
| H | -3.40605 | -2.46081 | -1.60449 |
| C | -4.47604 | -0.83360 | -0.63448 |
| H | -5.45664 | -1.11006 | -1.03071 |
| H | -4.06480 | -0.05498 | -1.27927 |
| H | -4.62430 | -0.42927 | 0.36912  |

**TS [2.2/4']**

-1009.3845499

ImgFreq/IR inten: -774.9873/21.7264

|   |          |          |          |
|---|----------|----------|----------|
| O | -1.18943 | -2.29431 | -0.24983 |
| C | 0.09088  | -2.11347 | 0.17343  |
| O | 0.87363  | -3.01367 | 0.09284  |
| C | 0.41016  | -0.75205 | 0.79101  |
| H | 0.00767  | -0.77917 | 1.80995  |
| C | 1.92320  | -0.58410 | 0.93097  |
| C | -0.28183 | 0.40602  | 0.01047  |
| H | 0.18228  | 0.51059  | -0.97222 |
| C | -1.76164 | 0.07290  | -0.12385 |
| C | -2.76576 | 1.04570  | -0.17483 |
| H | -2.48585 | 2.09361  | -0.10717 |
| C | -4.10030 | 0.67321  | -0.31347 |
| H | -4.86833 | 1.43762  | -0.35264 |
| C | -4.44552 | -0.67493 | -0.40310 |
| H | -5.48433 | -0.96783 | -0.51095 |
| C | -3.45814 | -1.65437 | -0.36112 |
| H | -3.69469 | -2.70912 | -0.44005 |
| C | -2.13008 | -1.26904 | -0.22331 |
| C | -0.10399 | 1.67134  | 0.78109  |
| N | 0.46270  | 2.79085  | 0.35313  |
| O | 1.00197  | 2.69072  | -0.95071 |
| O | -0.73573 | 3.56609  | 0.44742  |
| H | 1.50628  | 3.51102  | -1.04834 |
| H | -0.43303 | 1.72062  | 1.81217  |
| O | 2.49016  | -0.54793 | 1.99335  |
| O | 2.50540  | -0.46075 | -0.26304 |
| C | 3.95482  | -0.33885 | -0.27780 |
| H | 4.37120  | -1.21424 | 0.22378  |
| H | 4.22870  | 0.54564  | 0.30077  |
| C | 4.39039  | -0.24166 | -1.72307 |
| H | 5.47862  | -0.14855 | -1.77252 |
| H | 3.95149  | 0.63161  | -2.21071 |
| H | 4.09991  | -1.13311 | -2.28286 |

| <b>TS [2.2/4']</b>  |                                       |          |          |
|---------------------|---------------------------------------|----------|----------|
| -1009.3866489       | ImgFreq/IR inten: -897.0411/42.6806   |          |          |
| O                   | 0.12374                               | 0.46193  | 1.71061  |
| C                   | -0.32071                              | -0.77258 | 1.27250  |
| O                   | -0.67531                              | -1.57055 | 2.08358  |
| C                   | -0.31564                              | -0.99247 | -0.23453 |
| H                   | -0.24140                              | -2.07485 | -0.37962 |
| C                   | -1.61565                              | -0.53837 | -0.91319 |
| C                   | 0.87775                               | -0.32134 | -0.92439 |
| H                   | 0.70271                               | -0.33872 | -2.00576 |
| C                   | 0.99118                               | 1.12512  | -0.46264 |
| C                   | 1.46726                               | 2.15706  | -1.27570 |
| H                   | 1.76770                               | 1.93378  | -2.29515 |
| C                   | 1.54118                               | 3.46108  | -0.79827 |
| H                   | 1.90743                               | 4.25378  | -1.44098 |
| C                   | 1.13175                               | 3.74444  | 0.50661  |
| H                   | 1.18457                               | 4.75973  | 0.88477  |
| C                   | 0.64722                               | 2.73255  | 1.32759  |
| H                   | 0.31885                               | 2.92870  | 2.34170  |
| C                   | 0.58539                               | 1.42954  | 0.83885  |
| C                   | 2.20301                               | -0.95754 | -0.66948 |
| N                   | 2.36864                               | -2.00054 | 0.12613  |
| O                   | 3.73346                               | -2.23184 | 0.41881  |
| O                   | 1.76925                               | -2.95827 | -0.73874 |
| H                   | 3.71173                               | -2.77134 | 1.22229  |
| H                   | 3.09054                               | -0.47134 | -1.08102 |
| O                   | -1.68449                              | -0.26350 | -2.08595 |
| O                   | -2.64529                              | -0.52909 | -0.06620 |
| C                   | -3.95142                              | -0.19790 | -0.61650 |
| H                   | -4.16938                              | -0.90278 | -1.42102 |
| H                   | -3.89491                              | 0.80230  | -1.05066 |
| C                   | -4.95465                              | -0.28264 | 0.51255  |
| H                   | -5.95221                              | -0.04215 | 0.13502  |
| H                   | -4.71324                              | 0.42263  | 1.31065  |
| H                   | -4.98386                              | -1.28707 | 0.93955  |
| <b>TS [6.1/6.2]</b> |                                       |          |          |
| -1009.3803317       | ImgFreq/IR inten: -2358.3760/451.6270 |          |          |
| O                   | -0.06854                              | 0.43936  | 1.68772  |
| C                   | -0.41342                              | -0.85204 | 1.38164  |
| O                   | -0.74195                              | -1.59036 | 2.26275  |
| C                   | -0.34948                              | -1.24175 | -0.08829 |
| C                   | -1.64319                              | -0.92246 | -0.84874 |
| H                   | -0.24827                              | -2.32896 | -0.11370 |
| C                   | 0.85550                               | -0.60347 | -0.82359 |
| H                   | 0.67244                               | -0.74156 | -1.89308 |
| C                   | 0.90334                               | 0.87263  | -0.50323 |

|   |          |          |          |
|---|----------|----------|----------|
| C | 1.40390  | 1.82778  | -1.39334 |
| H | 1.77491  | 1.50101  | -2.36017 |
| C | 1.42830  | 3.17725  | -1.05907 |
| H | 1.82015  | 3.90380  | -1.76250 |
| C | 0.94224  | 3.59163  | 0.18325  |
| H | 0.95737  | 4.64257  | 0.45191  |
| C | 0.43343  | 2.66130  | 1.08115  |
| H | 0.05082  | 2.95494  | 2.05178  |
| C | 0.41960  | 1.31301  | 0.73057  |
| C | 2.18141  | -1.29023 | -0.52479 |
| O | 2.06858  | -2.71079 | -0.56152 |
| N | 2.81917  | -0.90929 | 0.68186  |
| O | 4.04887  | -1.10431 | 0.46230  |
| H | 2.50184  | -3.05935 | -1.34674 |
| H | 3.71933  | -1.28859 | -0.76648 |
| O | -1.75442 | -1.08336 | -2.03937 |
| O | -2.61220 | -0.47145 | -0.04795 |
| C | -3.89610 | -0.17664 | -0.66501 |
| H | -4.26538 | -1.09117 | -1.13315 |
| H | -3.73486 | 0.56314  | -1.45156 |
| C | -4.81934 | 0.32731  | 0.42239  |
| H | -5.79940 | 0.55538  | -0.00542 |
| H | -4.42855 | 1.23747  | 0.88231  |
| H | -4.95435 | -0.42234 | 1.20475  |

**TS [6.2/6.3]**

-1009.4706740

ImgFreq/IR inten: -1882.8793/388.3928

|   |          |          |          |
|---|----------|----------|----------|
| O | -0.04427 | 0.29626  | 1.74619  |
| C | -0.30341 | -0.95570 | 1.26302  |
| O | -0.56556 | -1.83733 | 2.03035  |
| C | -0.19444 | -1.12764 | -0.24575 |
| C | -1.45031 | -0.67914 | -1.00602 |
| H | -0.10378 | -2.20011 | -0.41966 |
| C | 1.03357  | -0.38098 | -0.80309 |
| H | 0.96782  | -0.40479 | -1.89573 |
| C | 0.96566  | 1.06020  | -0.33394 |
| C | 1.42352  | 2.13817  | -1.09241 |
| H | 1.87598  | 1.94810  | -2.05977 |
| C | 1.31141  | 3.44036  | -0.61587 |
| H | 1.67420  | 4.26814  | -1.21507 |
| C | 0.73250  | 3.67708  | 0.63193  |
| H | 0.64234  | 4.69059  | 1.00799  |
| C | 0.26630  | 2.61619  | 1.40105  |
| H | -0.18339 | 2.77059  | 2.37508  |
| C | 0.39039  | 1.32084  | 0.90956  |
| C | 2.36007  | -1.00300 | -0.44631 |
| O | 3.48247  | -0.39776 | -0.63062 |

|                      |  |                                       |          |          |
|----------------------|--|---------------------------------------|----------|----------|
| N                    |  | 2.68478                               | -2.16747 | 0.07744  |
| O                    |  | 1.80882                               | -3.26024 | 0.14928  |
| H                    |  | 3.87375                               | -1.59225 | -0.16488 |
| H                    |  | 1.77208                               | -3.50534 | 1.08586  |
| O                    |  | -1.46999                              | -0.52266 | -2.20107 |
| O                    |  | -2.50183                              | -0.53356 | -0.19688 |
| C                    |  | -3.76878                              | -0.17358 | -0.81783 |
| H                    |  | -4.03172                              | -0.95854 | -1.52956 |
| H                    |  | -3.62290                              | 0.75311  | -1.37582 |
| C                    |  | -4.79252                              | -0.02979 | 0.28651  |
| H                    |  | -5.76159                              | 0.23513  | -0.14486 |
| H                    |  | -4.50724                              | 0.75510  | 0.99011  |
| H                    |  | -4.90972                              | -0.96312 | 0.84102  |
| <b>TS [6.1/6.2]w</b> |  |                                       |          |          |
| -1085.8894675        |  | ImgFreq/IR inten: -1591.9468/751.6748 |          |          |
| O                    |  | -0.27101                              | 0.20815  | 1.78077  |
| C                    |  | -0.69254                              | -1.01883 | 1.33899  |
| O                    |  | -1.09611                              | -1.81964 | 2.13022  |
| C                    |  | -0.57786                              | -1.26624 | -0.15893 |
| C                    |  | -1.77683                              | -0.74951 | -0.96300 |
| H                    |  | -0.56897                              | -2.34902 | -0.29058 |
| C                    |  | 0.73258                               | -0.66302 | -0.73172 |
| H                    |  | 0.67039                               | -0.75294 | -1.81816 |
| C                    |  | 0.75444                               | 0.79592  | -0.34169 |
| C                    |  | 1.18873                               | 1.81571  | -1.19175 |
| H                    |  | 1.57814                               | 1.55669  | -2.17061 |
| C                    |  | 1.13698                               | 3.14865  | -0.79519 |
| H                    |  | 1.48479                               | 3.92662  | -1.46624 |
| C                    |  | 0.62748                               | 3.48006  | 0.46122  |
| H                    |  | 0.58565                               | 4.51698  | 0.77744  |
| C                    |  | 0.15411                               | 2.48370  | 1.30822  |
| H                    |  | -0.26008                              | 2.71248  | 2.28330  |
| C                    |  | 0.21331                               | 1.15777  | 0.89392  |
| C                    |  | 1.92376                               | -1.53849 | -0.25601 |
| O                    |  | 1.66393                               | -2.87166 | -0.55637 |
| N                    |  | 2.68769                               | -1.36692 | 0.83592  |
| O                    |  | 3.09798                               | -0.17379 | 1.11440  |
| H                    |  | 2.20499                               | -3.41614 | 0.03587  |
| H                    |  | 3.02713                               | -0.89176 | -1.06058 |
| H                    |  | 3.58101                               | 0.33022  | -0.23184 |
| O                    |  | 3.74171                               | 0.04715  | -1.23589 |
| H                    |  | 4.65591                               | -0.25590 | -1.32731 |
| O                    |  | -1.78679                              | -0.70227 | -2.16793 |
| O                    |  | -2.79972                              | -0.39882 | -0.17791 |
| C                    |  | -4.01476                              | 0.04980  | -0.83973 |
| H                    |  | -4.35050                              | -0.74484 | -1.50887 |



|   |          |          |          |
|---|----------|----------|----------|
| H | -3.76905 | 0.92166  | -1.44926 |
| C | -5.03065 | 0.36457  | 0.23620  |
| H | -5.96236 | 0.70125  | -0.22660 |
| H | -4.67380 | 1.15651  | 0.89815  |
| H | -5.24955 | -0.51692 | 0.84233  |

**TS [6.2/6.3]w**

-1085.9655039

ImgFreq/IR inten: -1717.4712/137.0958

|   |          |          |          |
|---|----------|----------|----------|
| O | -0.61659 | 0.68170  | 1.74190  |
| C | -0.51235 | -0.67707 | 1.60938  |
| O | -0.65734 | -1.37194 | 2.57035  |
| C | -0.28650 | -1.20553 | 0.19804  |
| C | -1.62110 | -1.39657 | -0.55656 |
| H | 0.11610  | -2.21489 | 0.31667  |
| C | 0.65933  | -0.34555 | -0.67394 |
| H | 0.42496  | -0.59128 | -1.71061 |
| C | 0.37587  | 1.12462  | -0.44512 |
| C | 0.71167  | 2.08984  | -1.40047 |
| H | 1.20738  | 1.77242  | -2.31300 |
| C | 0.41769  | 3.43411  | -1.19964 |
| H | 0.68772  | 4.16639  | -1.95261 |
| C | -0.23425 | 3.83168  | -0.03072 |
| H | -0.47426 | 4.87695  | 0.13291  |
| C | -0.58295 | 2.88881  | 0.92886  |
| H | -1.08883 | 3.16941  | 1.84571  |
| C | -0.27246 | 1.54641  | 0.71688  |
| C | 2.13871  | -0.70278 | -0.55949 |
| O | 2.70051  | -1.18898 | -1.61302 |
| N | 2.87538  | -0.54246 | 0.51659  |
| O | 2.18091  | -0.18466 | 1.68508  |
| H | 3.87443  | -1.47578 | -1.27767 |
| H | 2.62463  | 0.60684  | 2.01981  |
| H | 4.07106  | -1.07996 | 0.31145  |
| O | 4.80309  | -1.54519 | -0.51103 |
| H | 5.09003  | -2.44579 | -0.32377 |
| O | -1.67276 | -1.65085 | -1.73354 |
| O | -2.67672 | -1.28244 | 0.25166  |
| C | -3.99762 | -1.49826 | -0.32309 |
| H | -4.59398 | -1.83495 | 0.52424  |
| H | -3.92642 | -2.30044 | -1.05766 |
| C | -4.55031 | -0.22274 | -0.93120 |
| H | -5.57140 | -0.39859 | -1.28205 |
| H | -3.95231 | 0.10148  | -1.78457 |
| H | -4.58002 | 0.58254  | -0.19378 |

**TS [6.2/7]<sup>+</sup>w**

-1086.3392486

ImgFreq/IR inten: -156.1182/85.2664

|   |          |         |         |
|---|----------|---------|---------|
| O | -0.03895 | 0.61962 | 1.01697 |
|---|----------|---------|---------|

|                                                          |          |          |          |
|----------------------------------------------------------|----------|----------|----------|
| C                                                        | 0.08204  | 1.21589  | -0.19435 |
| O                                                        | 0.78255  | 2.31514  | -0.17355 |
| C                                                        | 0.22495  | 0.28862  | -1.38262 |
| C                                                        | 1.44070  | -0.66226 | -1.36529 |
| H                                                        | 0.35559  | 0.87696  | -2.28955 |
| C                                                        | -1.09055 | -0.50942 | -1.35670 |
| H                                                        | -1.26239 | -1.13239 | -2.23281 |
| C                                                        | -1.12028 | -1.29639 | -0.05272 |
| C                                                        | -1.66032 | -2.57548 | 0.08031  |
| H                                                        | -2.07992 | -3.07127 | -0.78891 |
| C                                                        | -1.65224 | -3.21604 | 1.31659  |
| H                                                        | -2.06406 | -4.21417 | 1.40893  |
| C                                                        | -1.11225 | -2.57594 | 2.43256  |
| H                                                        | -1.10598 | -3.07444 | 3.39499  |
| C                                                        | -0.57520 | -1.29562 | 2.32226  |
| H                                                        | -0.15042 | -0.78329 | 3.17743  |
| C                                                        | -0.58685 | -0.67592 | 1.08233  |
| C                                                        | -2.14059 | 0.55690  | -1.18791 |
| O                                                        | -3.40562 | 0.33137  | -1.42602 |
| N                                                        | -1.62990 | 1.62893  | -0.67406 |
| O                                                        | -2.52376 | 2.53486  | -0.13073 |
| H                                                        | -3.96109 | 1.07937  | -1.14114 |
| H                                                        | -2.16699 | 3.41722  | -0.31875 |
| O                                                        | 0.98496  | 3.65438  | 2.08389  |
| H                                                        | 0.85549  | 2.73868  | 0.73009  |
| H                                                        | 0.94332  | 3.30070  | 2.97929  |
| H                                                        | 1.51759  | 4.45788  | 2.10538  |
| O                                                        | 1.44703  | -1.66450 | -2.03015 |
| O                                                        | 2.43361  | -0.20890 | -0.61217 |
| C                                                        | 3.67240  | -0.99818 | -0.60942 |
| H                                                        | 4.01838  | -1.07314 | -1.64100 |
| H                                                        | 3.42650  | -2.00099 | -0.25767 |
| C                                                        | 4.66298  | -0.29212 | 0.28629  |
| H                                                        | 5.59822  | -0.85693 | 0.30584  |
| H                                                        | 4.29326  | -0.21935 | 1.31138  |
| H                                                        | 4.88454  | 0.71269  | -0.07898 |
| <b>TS [7/8]<sup>+</sup>w</b>                             |          |          |          |
| -1086.2689347      ImgFreq/IR inten: -1839.7895/970.5662 |          |          |          |
| O                                                        | 0.08406  | -0.18210 | -1.35989 |
| C                                                        | -0.28746 | -1.37564 | -0.37478 |
| O                                                        | 0.07164  | -2.30311 | -1.18120 |
| C                                                        | 0.22071  | -0.98673 | 1.01350  |
| C                                                        | 1.70454  | -0.69769 | 1.24461  |
| H                                                        | -0.05454 | -1.78843 | 1.69948  |
| C                                                        | -0.69001 | 0.25114  | 1.25670  |
| H                                                        | -0.77698 | 0.53895  | 2.30229  |

|                                                                         |          |          |          |
|-------------------------------------------------------------------------|----------|----------|----------|
| C                                                                       | -0.19270 | 1.40713  | 0.38806  |
| C                                                                       | -0.11509 | 2.72247  | 0.84643  |
| H                                                                       | -0.44738 | 2.95874  | 1.85166  |
| C                                                                       | 0.40878  | 3.72345  | 0.02974  |
| H                                                                       | 0.47286  | 4.73992  | 0.40083  |
| C                                                                       | 0.85841  | 3.41860  | -1.25372 |
| H                                                                       | 1.26763  | 4.20001  | -1.88631 |
| C                                                                       | 0.78350  | 2.11384  | -1.74295 |
| H                                                                       | 1.11288  | 1.86521  | -2.74687 |
| C                                                                       | 0.26119  | 1.14065  | -0.91179 |
| C                                                                       | -2.01762 | -0.24462 | 0.70225  |
| O                                                                       | -3.14873 | 0.26095  | 1.01149  |
| N                                                                       | -1.76152 | -1.20566 | -0.15642 |
| O                                                                       | -2.66400 | -1.72984 | -1.03926 |
| H                                                                       | -3.97845 | -0.10447 | 0.54178  |
| H                                                                       | -2.16188 | -2.44549 | -1.48395 |
| H                                                                       | 0.54867  | -1.17193 | -1.84882 |
| O                                                                       | -5.32543 | -0.56003 | -0.03372 |
| H                                                                       | -5.43594 | -1.19739 | -0.74801 |
| H                                                                       | -6.18968 | -0.23300 | 0.24249  |
| O                                                                       | 2.07253  | -0.17786 | 2.26541  |
| O                                                                       | 2.47453  | -1.10819 | 0.24462  |
| C                                                                       | 3.92581  | -0.95481 | 0.42198  |
| H                                                                       | 4.20092  | -1.47367 | 1.34082  |
| H                                                                       | 4.13295  | 0.10801  | 0.55418  |
| C                                                                       | 4.60070  | -1.53612 | -0.79811 |
| H                                                                       | 5.68416  | -1.44880 | -0.68617 |
| H                                                                       | 4.31530  | -1.00308 | -1.70785 |
| H                                                                       | 4.35886  | -2.59345 | -0.92156 |
| <b>TS [7/8]<sup>+</sup>2w</b>                                           |          |          |          |
| -1086.3192152                      ImgFreq/IR inten: -241.5133/103.9918 |          |          |          |
| O                                                                       | 1.12946  | -0.32845 | 1.23109  |
| C                                                                       | 1.04494  | -1.39068 | 0.09142  |
| O                                                                       | 1.32662  | -2.52020 | 0.52634  |
| C                                                                       | -0.18667 | -1.01586 | -0.77318 |
| C                                                                       | -1.53165 | -1.02251 | -0.06197 |
| H                                                                       | -0.25155 | -1.76060 | -1.57295 |
| C                                                                       | 0.24861  | 0.35502  | -1.36575 |
| H                                                                       | -0.31872 | 0.67145  | -2.23613 |
| C                                                                       | 0.27109  | 1.39336  | -0.25631 |
| C                                                                       | -0.10878 | 2.72419  | -0.44094 |
| H                                                                       | -0.45332 | 3.04948  | -1.41684 |
| C                                                                       | -0.05195 | 3.62649  | 0.61636  |
| H                                                                       | -0.35786 | 4.65561  | 0.46734  |
| C                                                                       | 0.39782  | 3.20050  | 1.86537  |
| H                                                                       | 0.44650  | 3.90037  | 2.69119  |

|   |          |          |          |
|---|----------|----------|----------|
| C | 0.79580  | 1.88177  | 2.06552  |
| H | 1.16621  | 1.54967  | 3.02949  |
| C | 0.72880  | 0.98223  | 1.00505  |
| C | 1.69573  | 0.07247  | -1.71632 |
| O | 2.34889  | 0.74196  | -2.62840 |
| N | 2.14074  | -0.84886 | -0.93741 |
| O | 3.42832  | -1.26955 | -0.88320 |
| H | 3.29221  | 0.50633  | -2.67057 |
| H | 3.37496  | -2.11070 | -0.38158 |
| H | 0.53154  | -2.80744 | 2.42565  |
| H | 0.60697  | -1.26384 | 2.51646  |
| O | 0.04590  | -2.05032 | 2.80338  |
| H | -0.77994 | -1.92991 | 2.20961  |
| O | -1.74127 | -1.45660 | 1.06538  |
| O | -2.47668 | -0.54769 | -0.83575 |
| C | -3.86303 | -0.53566 | -0.32463 |
| H | -3.86647 | 0.06146  | 0.58754  |
| H | -4.12253 | -1.56351 | -0.07029 |
| C | -4.74169 | 0.04068  | -1.40812 |
| H | -5.77578 | 0.05853  | -1.05556 |
| H | -4.70723 | -0.56446 | -2.31592 |
| H | -4.45414 | 1.06438  | -1.65529 |

**TS [8<sup>+</sup>2w/8:H<sub>3</sub>O<sup>+</sup>]**

-1086.3464809

ImgFreq/IR inten: -104.2035/161.0798

|   |          |          |          |
|---|----------|----------|----------|
| O | 0.84579  | 0.90551  | 1.45784  |
| C | 1.09635  | -1.93547 | 0.02528  |
| O | 1.28568  | -2.90840 | 0.70111  |
| C | -0.12253 | -1.32698 | -0.62093 |
| C | -1.34129 | -1.30988 | 0.31559  |
| H | -0.37555 | -1.96054 | -1.47510 |
| C | 0.36048  | 0.08689  | -1.14785 |
| H | 0.22617  | 0.12211  | -2.23224 |
| C | -0.34045 | 1.29120  | -0.54810 |
| C | -1.27778 | 2.02020  | -1.28600 |
| H | -1.47004 | 1.75683  | -2.32216 |
| C | -1.98545 | 3.06456  | -0.69726 |
| H | -2.71679 | 3.61806  | -1.27582 |
| C | -1.74970 | 3.39308  | 0.63755  |
| H | -2.29492 | 4.20712  | 1.10234  |
| C | -0.80710 | 2.68763  | 1.38199  |
| H | -0.60850 | 2.95155  | 2.41636  |
| C | -0.11116 | 1.64000  | 0.78741  |
| C | 1.86881  | 0.08940  | -0.88648 |
| O | 2.67072  | 0.99953  | -1.12165 |
| N | 2.18315  | -1.11810 | -0.35624 |
| O | 3.43940  | -1.46087 | 0.11094  |

|   |          |          |          |
|---|----------|----------|----------|
| H | 3.93901  | 1.00447  | -0.53374 |
| H | 3.27435  | -2.27699 | 0.63278  |
| H | 0.58282  | 0.75597  | 2.37450  |
| O | 4.80041  | 0.75920  | 0.09365  |
| H | 4.59312  | -0.16152 | 0.38487  |
| H | 5.67203  | 0.80771  | -0.32973 |
| O | -2.45079 | -1.45929 | -0.39987 |
| O | -1.27683 | -1.17520 | 1.50946  |
| C | -3.72170 | -1.43995 | 0.33299  |
| C | -4.83078 | -1.66448 | -0.66834 |
| H | -3.79861 | -0.47491 | 0.83613  |
| H | -3.67691 | -2.22109 | 1.09285  |
| H | -5.79330 | -1.64531 | -0.15130 |
| H | -4.73301 | -2.63382 | -1.16111 |
| H | -4.84311 | -0.88402 | -1.43189 |
